# Supplementary material
Source: PubMed Central journal article supplement (PMC7717174)
Supplement: NIHMS1027713-supplement-supplementary_material.pdf [file NIHMS1027713-supplement-supplementary_material.pdf]

## Supplementary Appendix

This appendix has been provided by the authors to give readers additional information about their work.

Supplement to: Jemal A, Miller KD, Ma J, et al. Higher lung cancer incidence in young women than young men in the United States. *N Engl J Med* 2018;378:1999-2009. DOI: [10.1056/NEJMoa1715907](https://doi.org/10.1056/NEJMoa1715907)

## Higher Lung Cancer Incidence in Young Women Than Young Men in the U.S.

Ahmedin Jemal, DVM, PhD; Kimberly D Miller, MPH; Jiemin Ma, PhD; Rebecca L Siegel, MPH; Stacey A Fedewa, PhD; Farhad Islami, MD, PhD; Susan S Devesa, PhD; Michael J Thun, MD, MS

### SUPPLEMENTARY APPENDIX

#### Table of contents

|    |                                                                                                                                                                           | Page |
|----|---------------------------------------------------------------------------------------------------------------------------------------------------------------------------|------|
| 1  | <b>Figure S1.</b> Age-specific lung cancer female-to-male incidence rate ratios (IRRs) by calendar period and race/ethnicity, 1995-2014 (reference group = males)         | 2    |
| 2  | <b>Figure S2.</b> Age-specific lung cancer incidence rates by race/ethnicity, sex, and cohort year of birth, 25 states                                                    | 3    |
| 3  | <b>Figure S3.</b> Age-specific lung cancer female-to-male mortality rate ratios (MRRs) by race/ethnicity and cohort year of birth (reference group = males)               | 4    |
| 4  | <b>Figure S4.</b> Age-specific lung cancer female-to-male incidence rate ratios (IRRs) among whites by histologic type and cohort year of birth (reference group = males) | 5    |
| 5  | <b>Figure S5.</b> Female-to-male ratio of current smoking prevalence by race/ethnicity, age, and birth cohort (reference group = males)                                   | 6    |
| 6  | <b>Figure S6.</b> Ever smoking prevalence by race/ethnicity, age, sex, and birth cohort                                                                                   | 7    |
| 7  | <b>Figure S7.</b> Female-to-male ratio of ever smoking prevalence by race/ethnicity, age, and birth cohort (reference group = males)                                      | 8    |
| 8  | <b>Figure S8.</b> Average cigarettes smoked per day by age, sex, and birth cohort among whites and blacks                                                                 | 9    |
| 9  | <b>Table S1.</b> International Classification of Diseases for Oncology, 3rd edition (ICD-O-3) morphology codes for lung cancer histologic types                           | 10   |
| 10 | <b>Table S2.</b> Age-specific lung cancer incidence rates and rate ratios (IRRs) by sex and calendar period, 1995-2014                                                    | 11   |
| 11 | <b>Table S3.</b> Age-specific lung cancer incidence rates and rate ratios (IRRs) by sex and cohort year of birth                                                          | 13   |
| 12 | <b>Table S4.</b> Age-specific current smoking prevalence and female-to-male prevalence ratios (PRs) by race/ethnicity and cohort year of birth                            | 18   |
| 13 | <b>Table S5.</b> Age-specific lung cancer incidence rates, rate ratios (IRRs), and stage distribution among whites, by sex, stage, and calendar period                    | 22   |

**Figure S1.** Age-specific lung cancer female-to-male incidence rate ratios (IRRs) by calendar period and race/ethnicity, 1995-2014 (reference group = males)

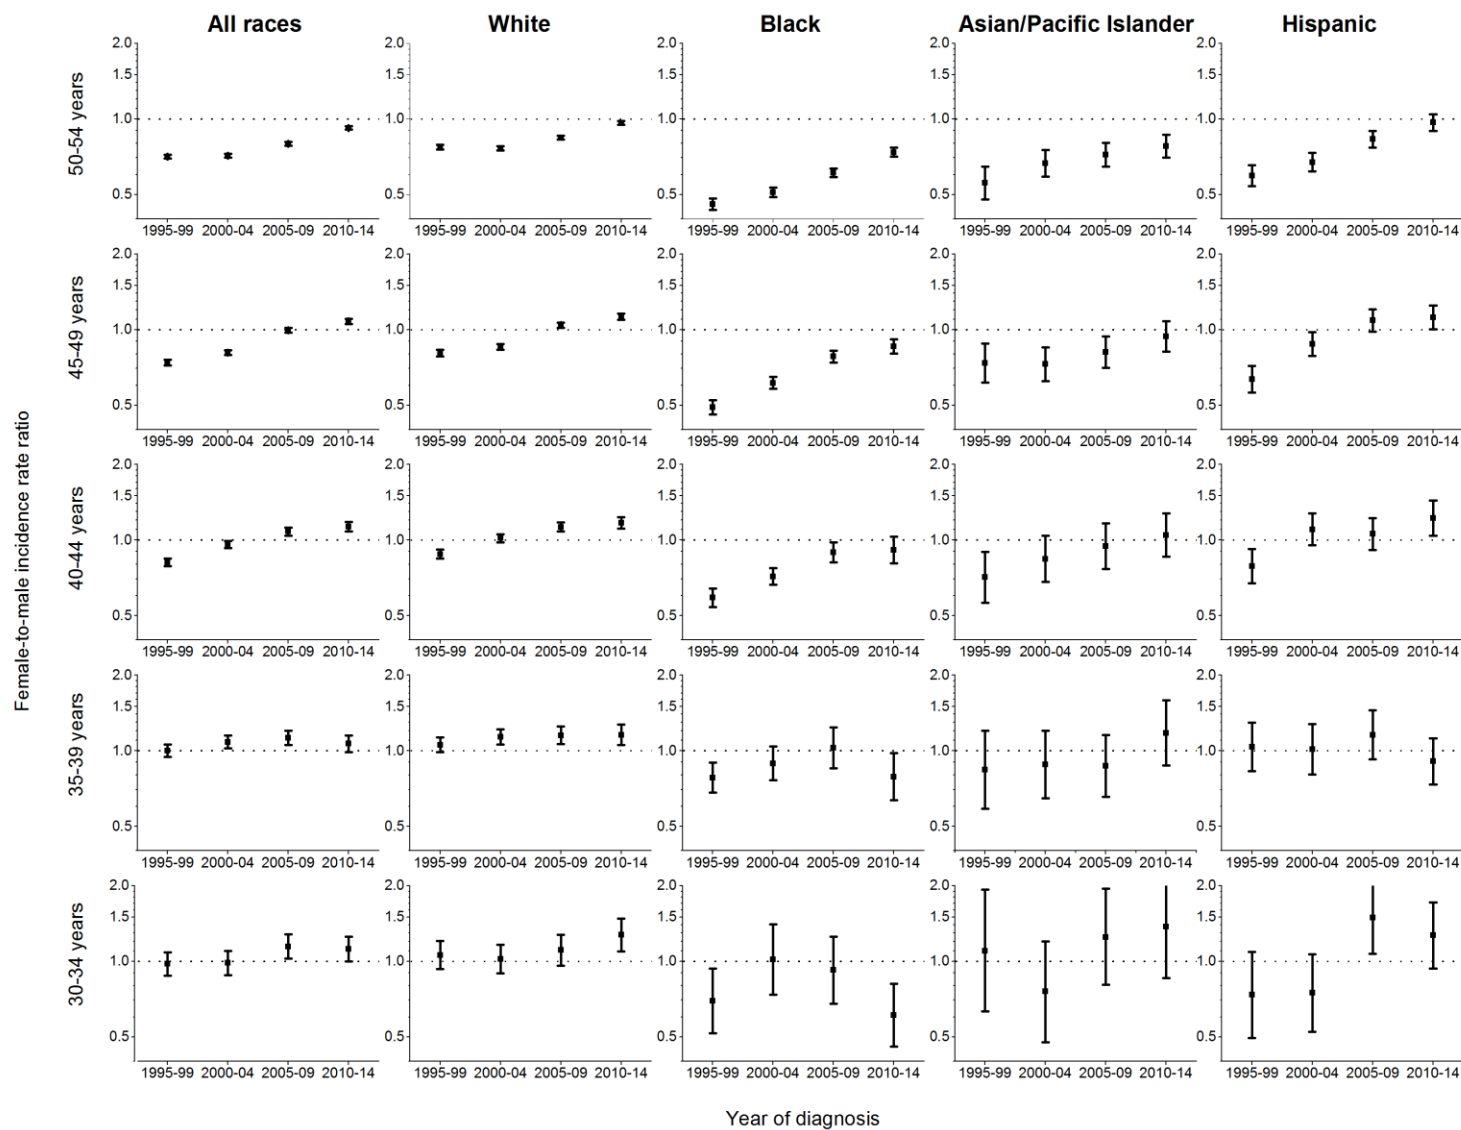

White, black, and Asian/Pacific Islander race exclude persons of Hispanic ethnicity. IRRs are based on unrounded rates and are shown with 95% confidence interval error bars.

**Figure S2.** Age-specific lung cancer incidence rates by race/ethnicity, sex, and cohort year of birth, 25 states

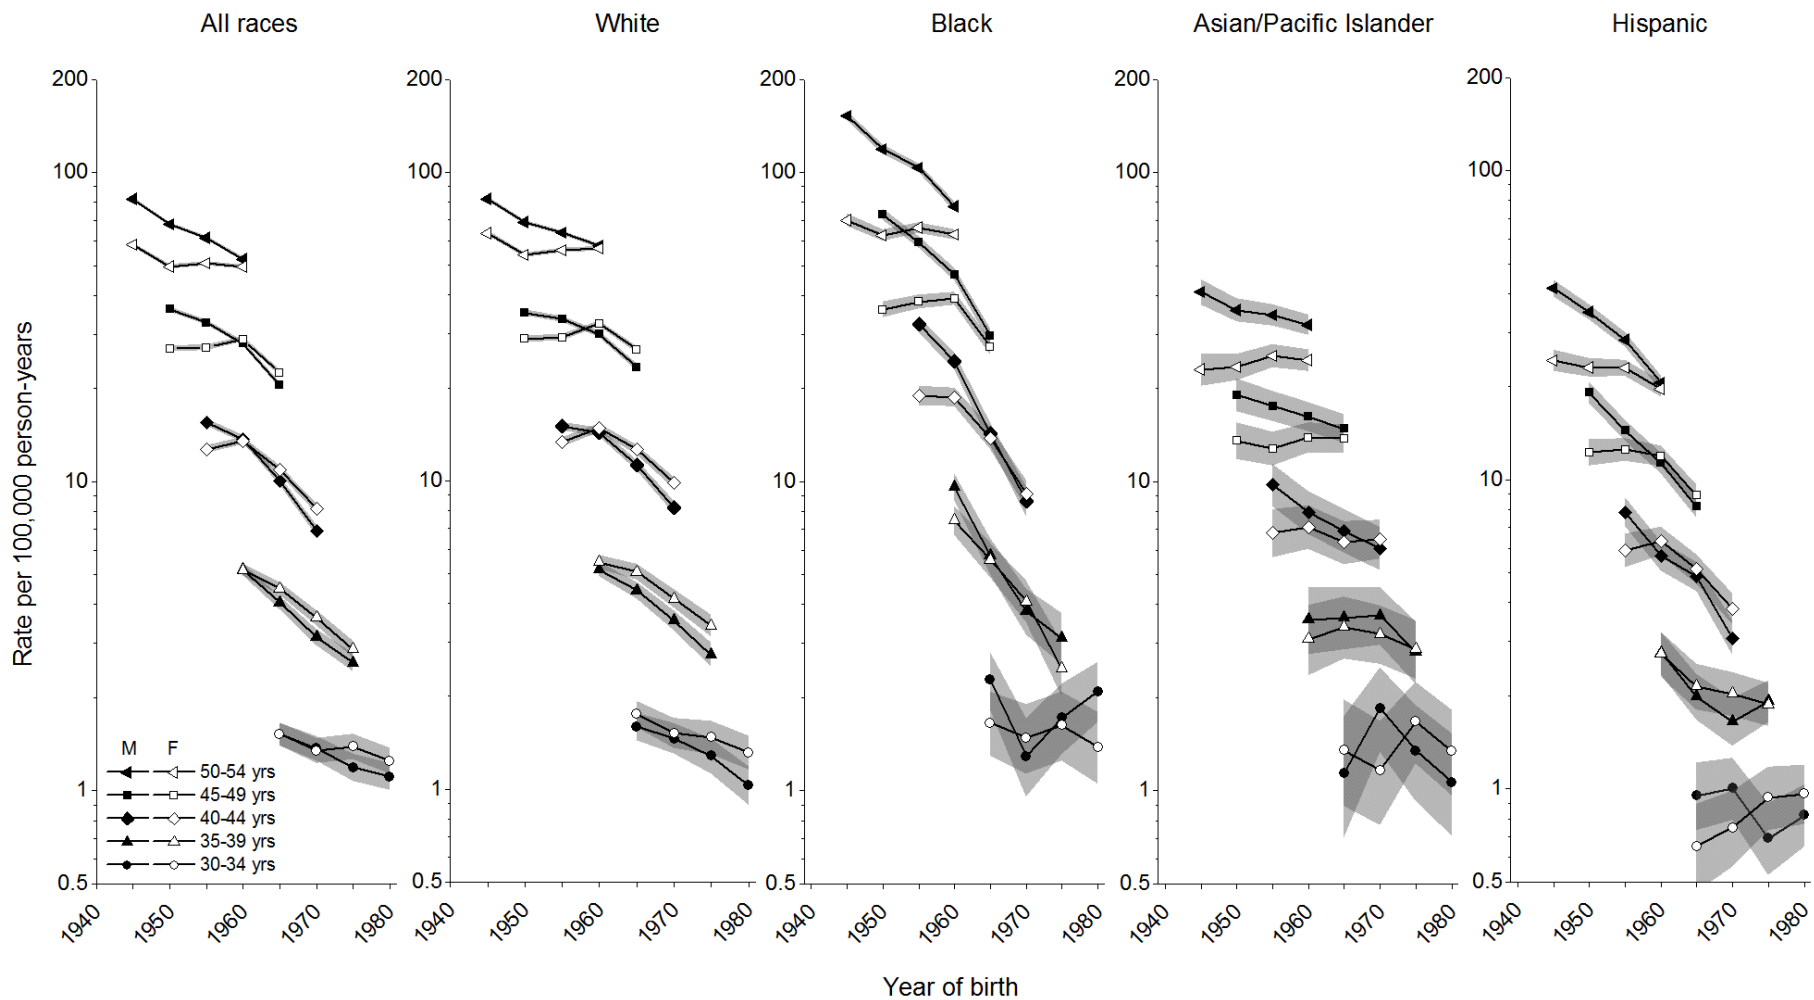

Abbreviations: F, female; M, male. White, black, and Asian/Pacific Islander race exclude persons of Hispanic ethnicity. Incidence rates are shown with 95% confidence intervals (shaded bands).

**Figure S3.** Age-specific lung cancer female-to-male mortality rate ratios (MRRs) by race/ethnicity and cohort year of birth (reference group = males)

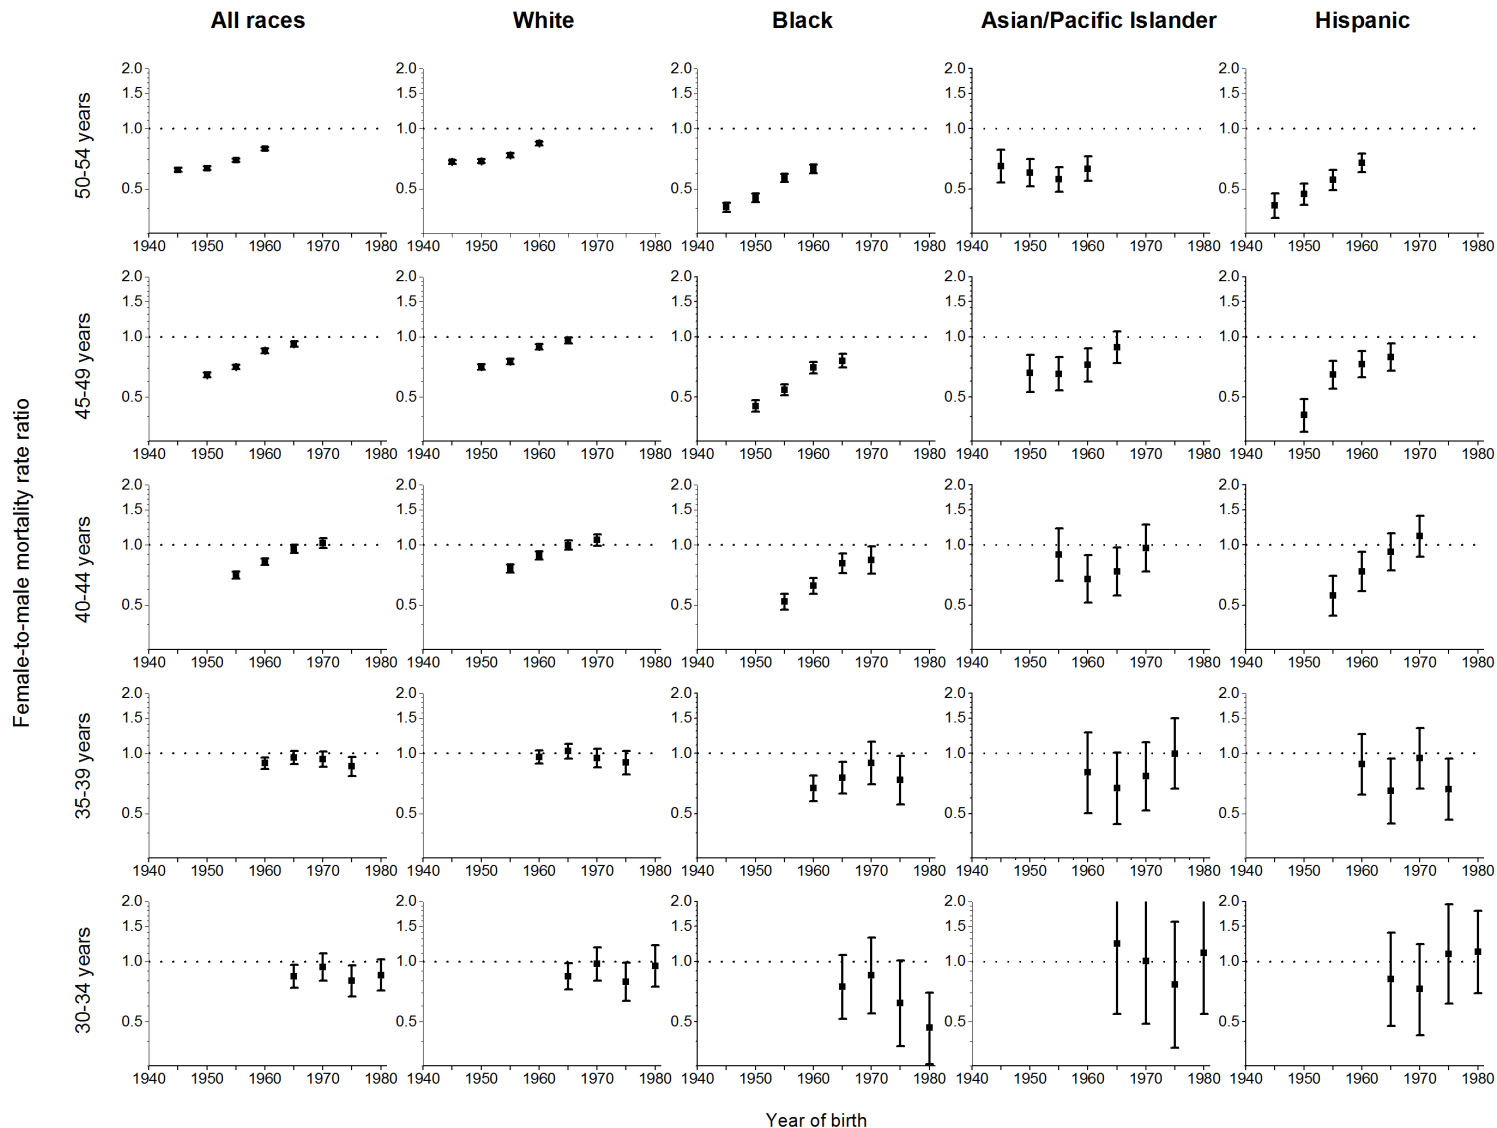

White, black, and Asian/Pacific Islander race exclude persons of Hispanic ethnicity. MRRs are based on unrounded rates and are shown with 95% confidence interval error bars. MRRs for 1995-1999 by race/ethnicity exclude data for Oklahoma. Underlying mortality data provided by the National Center for Health Statistics, Centers for Disease Control and Prevention, 2017; available through SEER\*Stat software (v. 8.3.4).<sup>1</sup>

**Figure S4.** Age-specific lung cancer female-to-male incidence rate ratios (IRRs) among whites by histologic type and cohort year of birth (reference group = males)

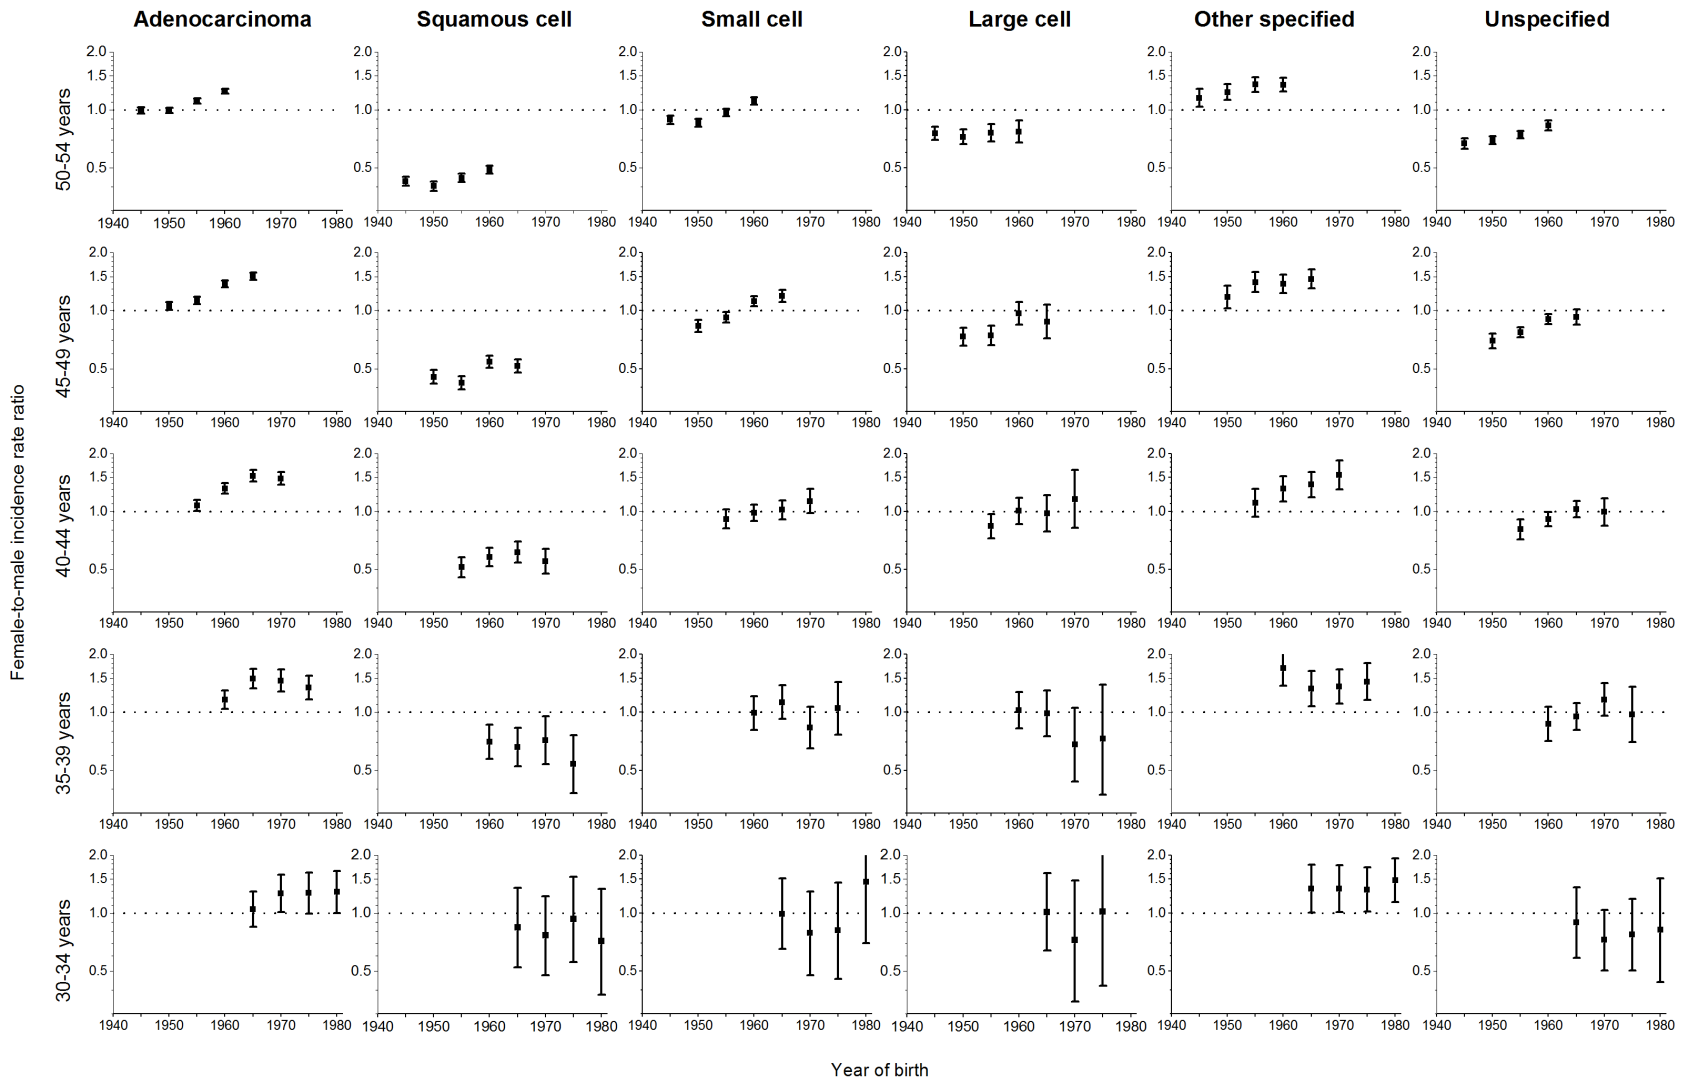

IRRs are based on unrounded rates and are shown with 95% confidence interval error bars. Persons of Hispanic ethnicity were excluded. The rate ratio for large cell lung carcinoma among 30-34 year-olds born circa 1980 could not be calculated due to sparse data among males (<6 cases).

**Figure S5.** Female-to-male ratio of current smoking prevalence by race/ethnicity, age, and birth cohort (reference group = males)

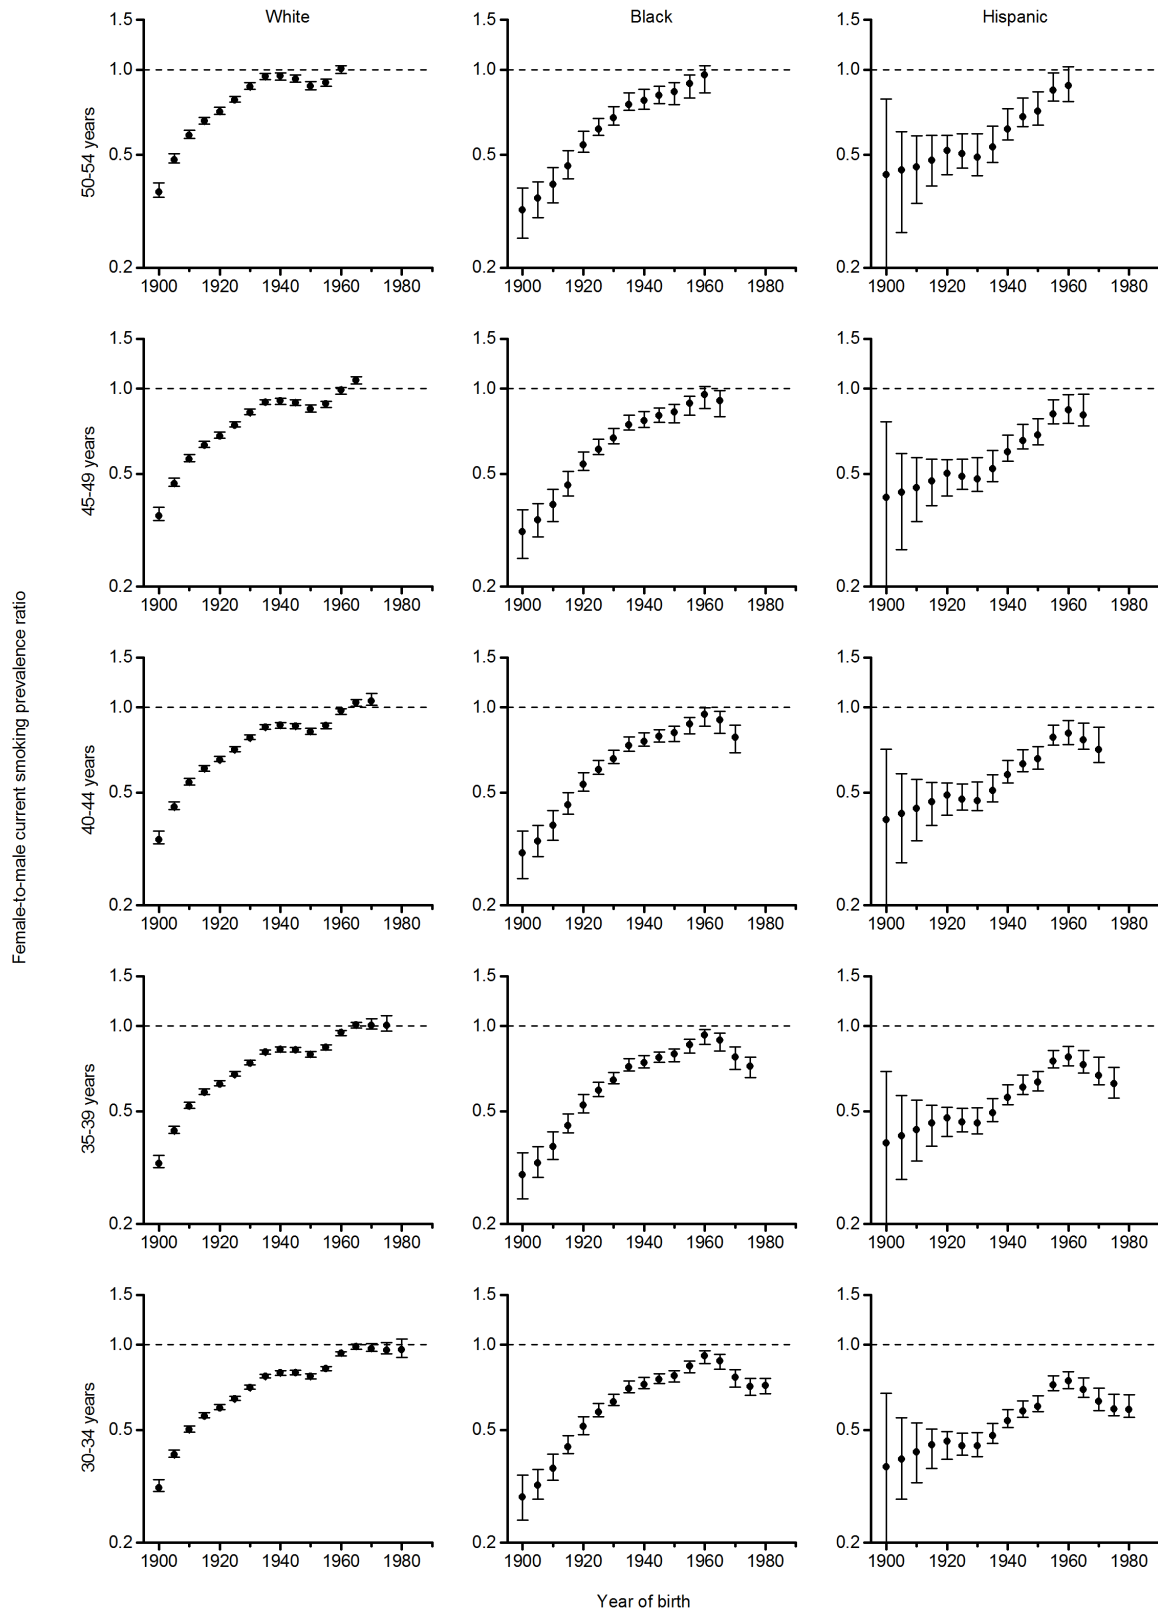

Error bars indicate 95% confidence intervals. White and black race excludes persons of Hispanic ethnicity.

**Figure S6.** Ever smoking prevalence by race/ethnicity, age, sex, and birth cohort

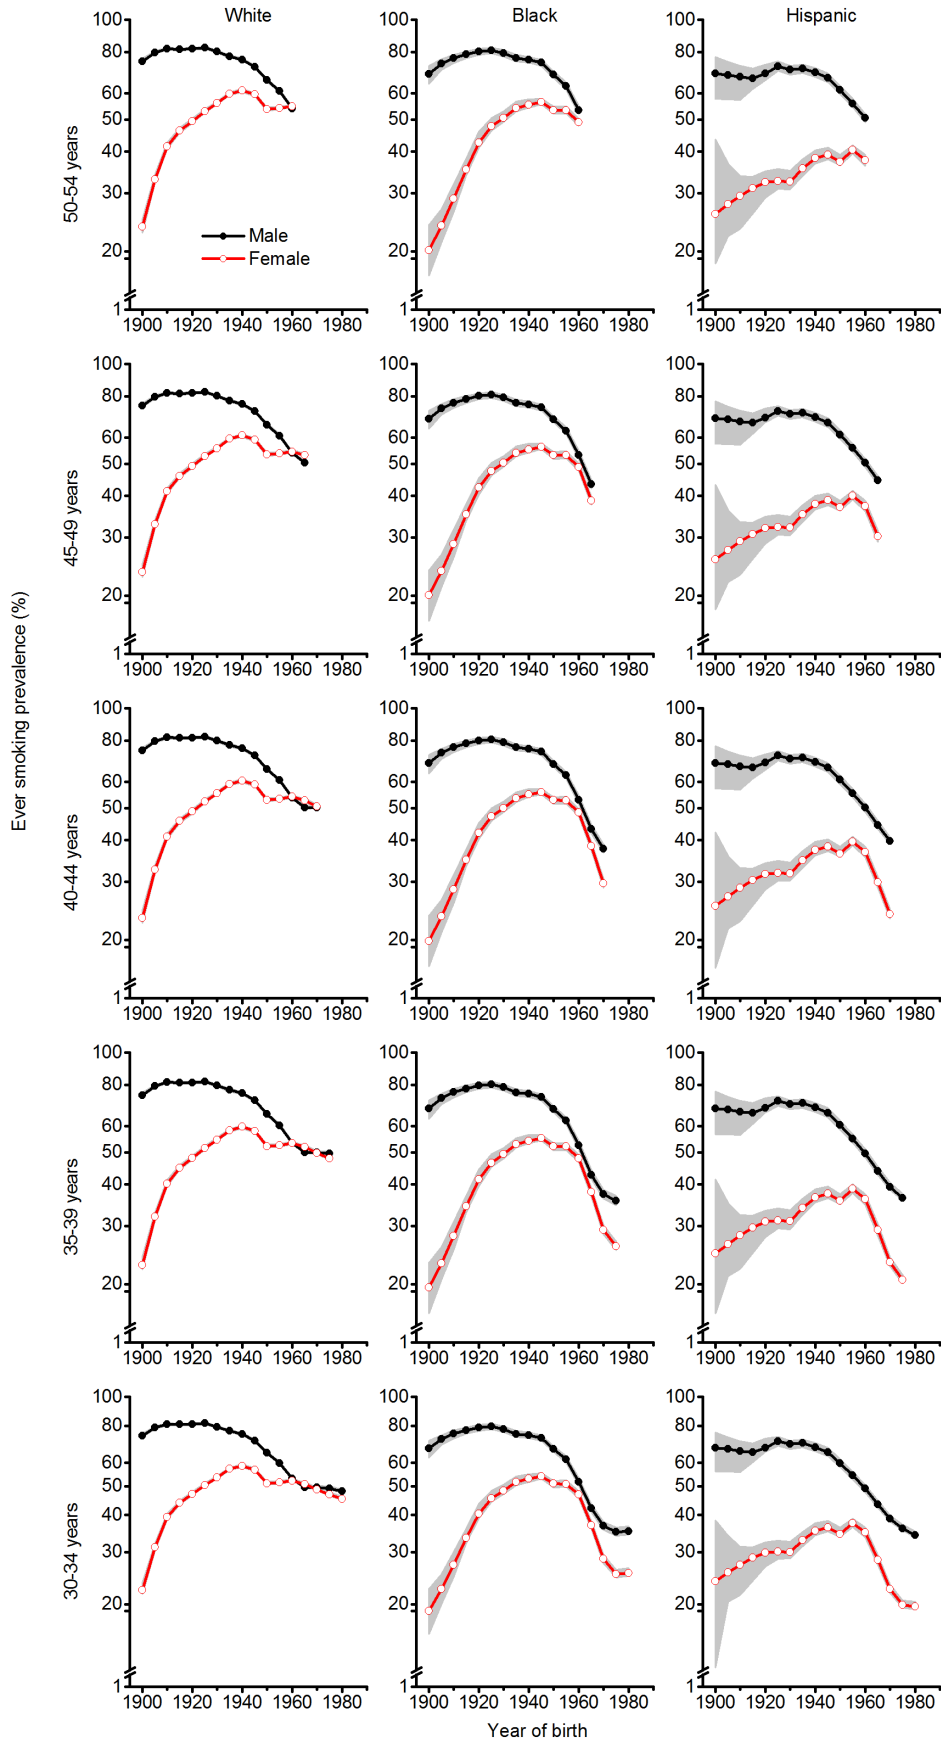

Shaded bands indicate 95% confidence intervals. White and black race excludes persons of Hispanic ethnicity.



**Figure S7.** Female-to-male ratio of ever smoking prevalence by race/ethnicity, age, and birth cohort (reference group = males)

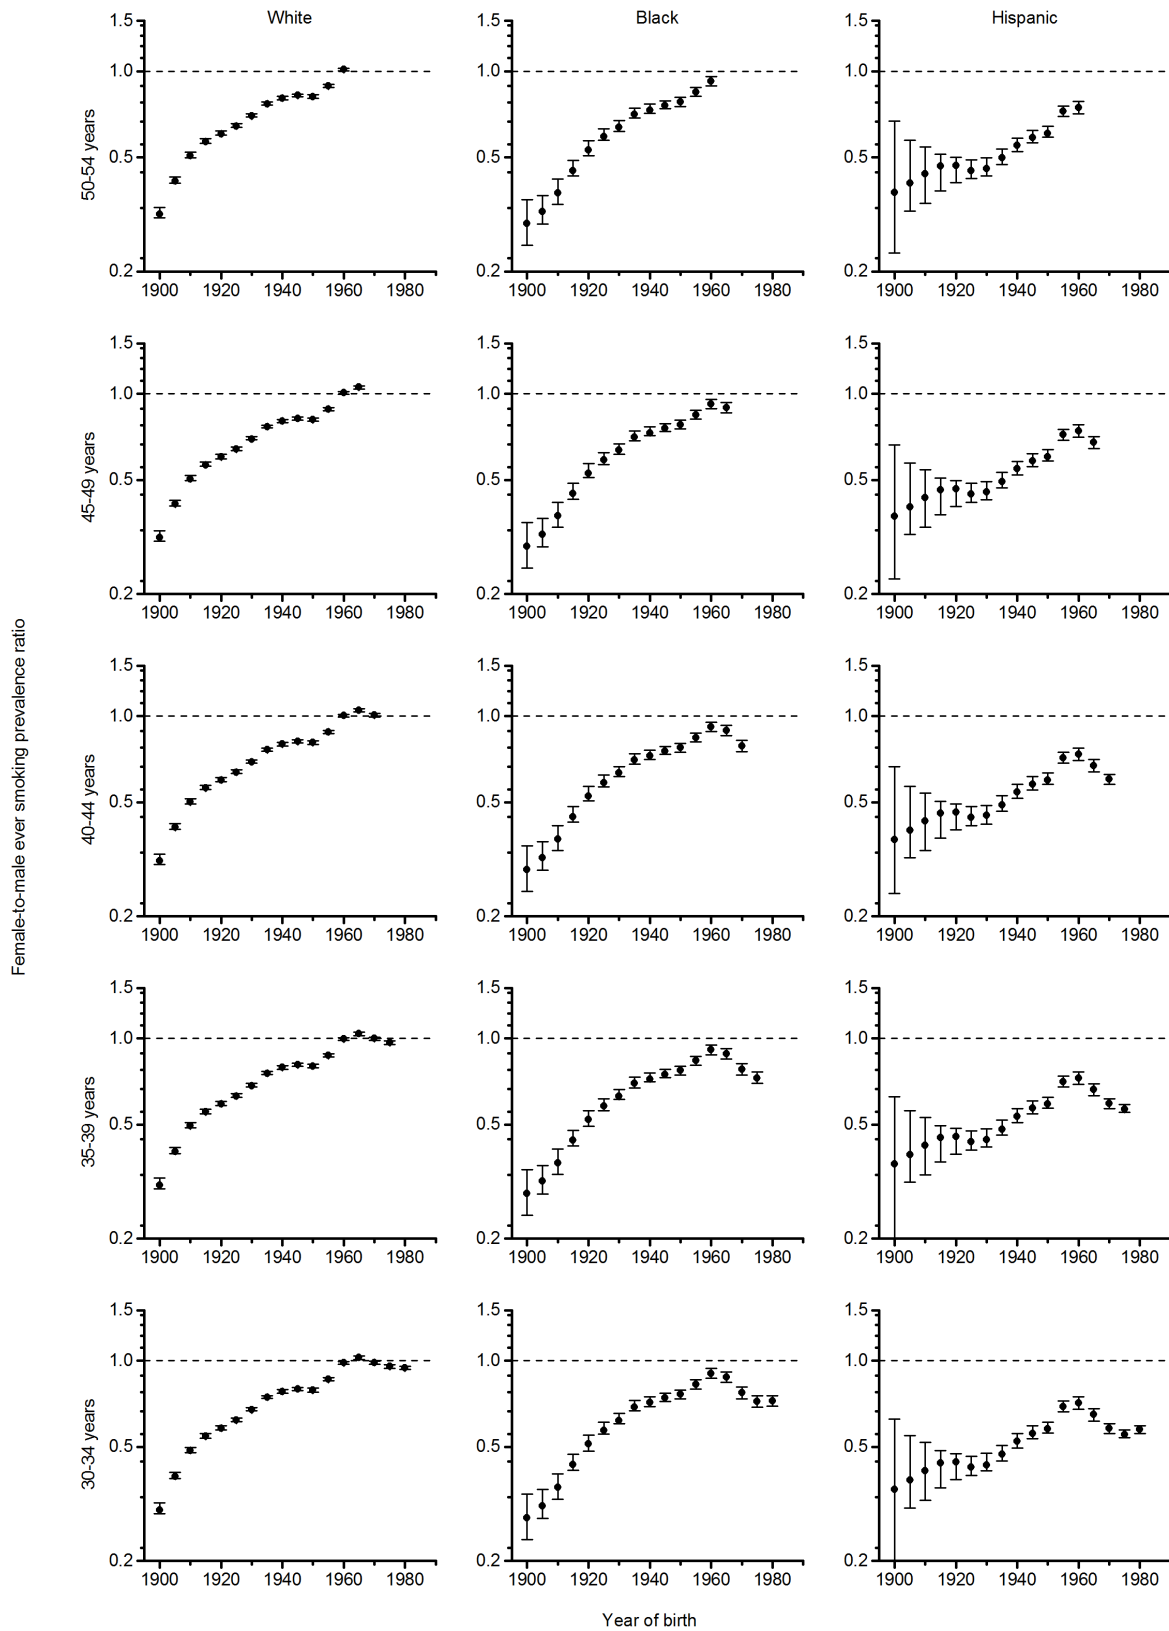

Error bars indicate 95% confidence intervals. White and black race excludes persons of Hispanic ethnicity.

**Figure S8.** Average cigarettes smoked per day by age, sex, and birth cohort among whites and blacks

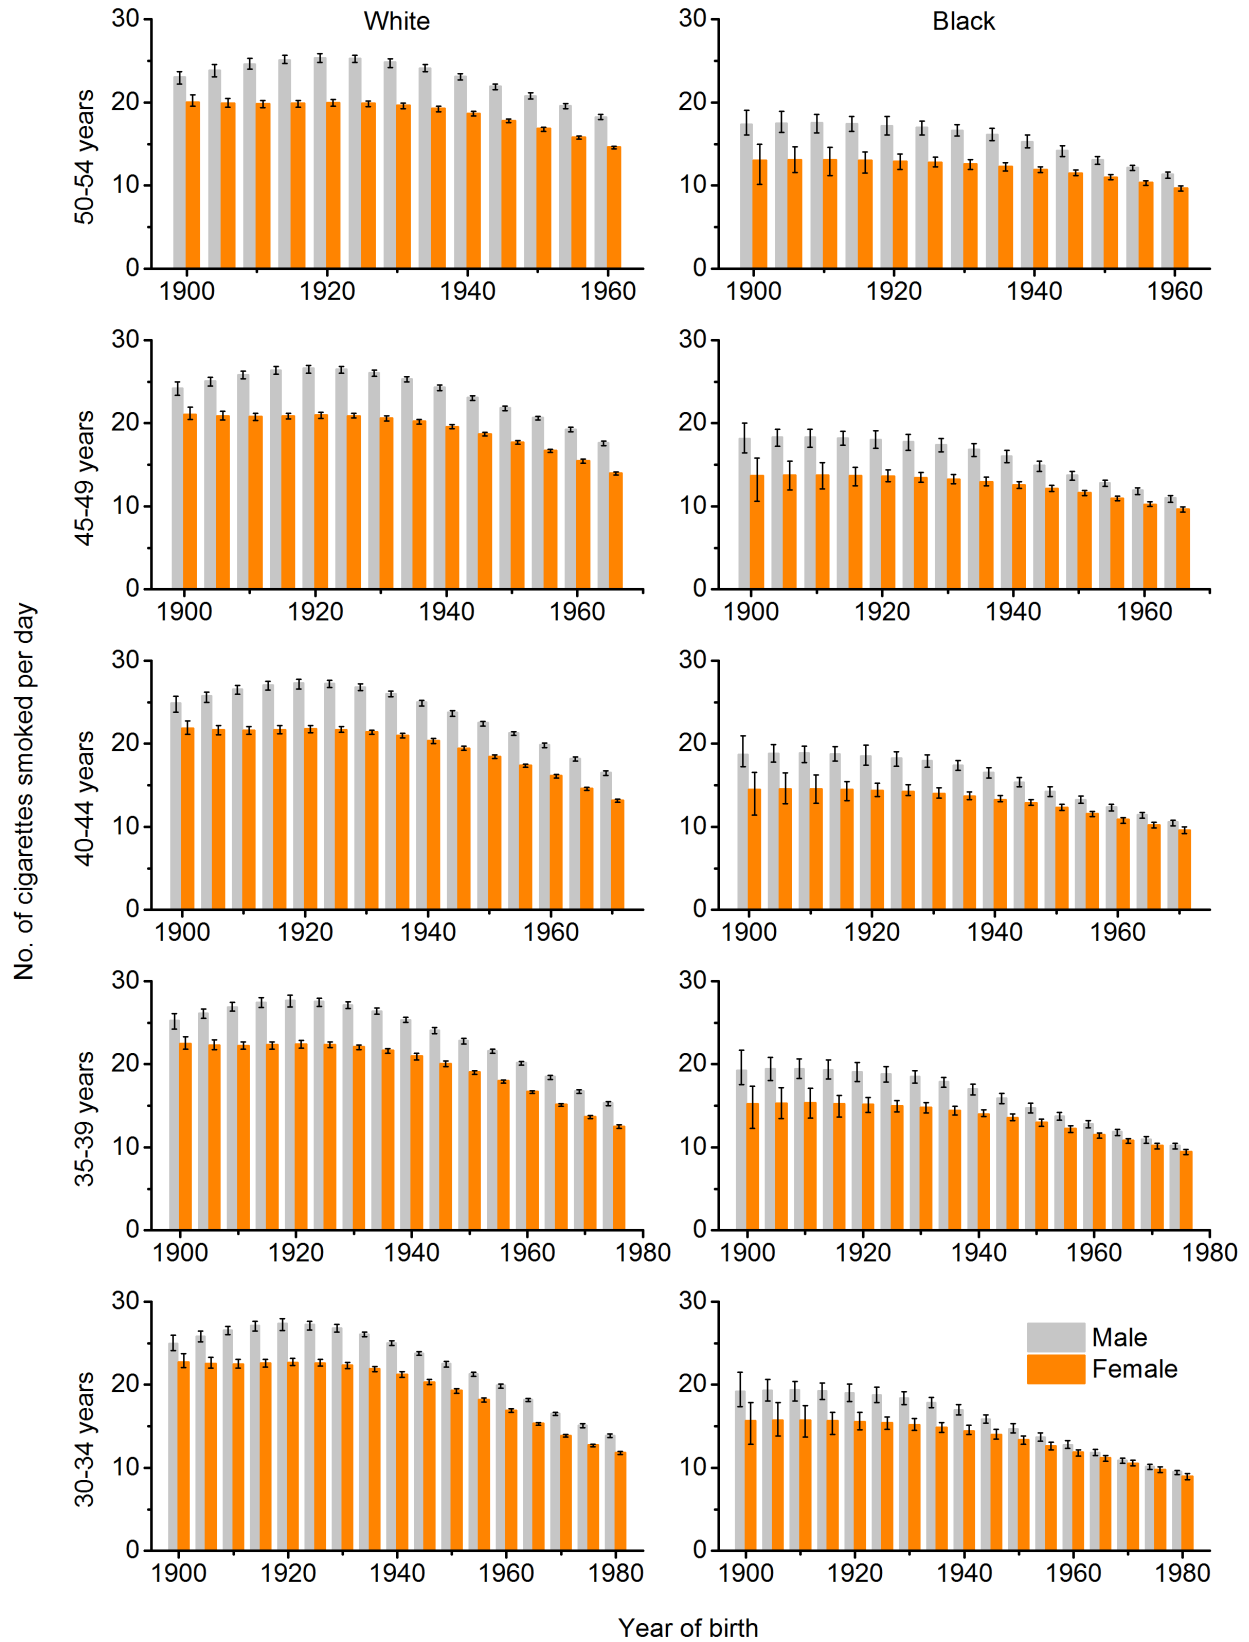

Error bars indicate 95% confidence intervals. White and black race excludes persons of Hispanic ethnicity.

**Table S1.** International Classification of Diseases for Oncology, 3rd edition (ICD-O-3) morphology codes for lung cancer histologic types.

|                           | <b>ICD-O-3 morphology codes</b>                                                                                                                                        |
|---------------------------|------------------------------------------------------------------------------------------------------------------------------------------------------------------------|
| Adenocarcinoma            | 8015, 8050, 8140-1, 8143-5, 8147, 8190, 8201, 8211, 8250-5, 8260, 8290, 8310, 8320, 8323, 8333, 8401, 8440, 8470-1, 8480-1, 8490, 8503, 8507, 8550, 8570-2, 8574, 8576 |
| Squamous cell carcinoma   | 8051-2, 8070-6, 8078, 8083-4, 8090, 8094, 8120, 8123                                                                                                                   |
| Large cell carcinoma      | 8012-4, 8021, 8034, 8082                                                                                                                                               |
| Small cell carcinoma      | 8002, 8041-5                                                                                                                                                           |
| Other specified carcinoma | 8003-4, 8022, 8030-3, 8035, 8200, 8240-1, 8243-6, 8249, 8430, 8525, 8560, 8562, 8575                                                                                   |
| Unspecified carcinoma*    | 8000-1, 8010-1, 8020, 8046, 8230                                                                                                                                       |

Non-carcinomas were excluded from type-specific analyses. \*Cases coded to histologic type non-small cell carcinoma (8046) were classified as unspecified carcinoma

**Table S2.** Age-specific lung cancer incidence rates and rate ratios (IRRs) by sex and calendar period, 1995-2014

|                              | 30-34 years |      |                                | 35-39 years |      |                                | 40-44 years |      |                                | 45-49 years |      |                                | 50-54 years |       |                                |
|------------------------------|-------------|------|--------------------------------|-------------|------|--------------------------------|-------------|------|--------------------------------|-------------|------|--------------------------------|-------------|-------|--------------------------------|
|                              | Rate        |      | Female-to-male<br>IRR (95% CI) | Rate        |       | Female-to-male<br>IRR (95% CI) |
|                              | Female      | Male |                                | Female      | Male |                                | Female      | Male |                                | Female      | Male |                                | Female      | Male  |                                |
| <b>ALL RACES</b>             |             |      |                                |             |      |                                |             |      |                                |             |      |                                |             |       |                                |
| 1995-99                      | 1.6         | 1.6  | 0.98 (0.87-1.09)               | 5.3         | 5.3  | 1.00 (0.94-1.06)               | 12.9        | 15.8 | <b>0.82 (0.79-0.85)</b>        | 27.0        | 36.5 | <b>0.74 (0.72-0.76)</b>        | 58.9        | 83.3  | <b>0.71 (0.69-0.72)</b>        |
| 2000-04                      | 1.4         | 1.4  | 0.98 (0.88-1.10)               | 4.7         | 4.4  | <b>1.08 (1.02-1.15)</b>        | 14.2        | 14.8 | <b>0.96 (0.93-0.99)</b>        | 28.2        | 34.8 | <b>0.81 (0.79-0.83)</b>        | 51.4        | 72.1  | <b>0.71 (0.70-0.73)</b>        |
| 2005-09                      | 1.5         | 1.3  | <b>1.15 (1.02-1.28)</b>        | 3.8         | 3.4  | <b>1.13 (1.05-1.20)</b>        | 12.0        | 11.1 | <b>1.08 (1.04-1.12)</b>        | 31.0        | 31.2 | 0.99 (0.97-1.01)               | 53.3        | 67.0  | <b>0.80 (0.78-0.81)</b>        |
| 2010-14                      | 1.3         | 1.2  | 1.12 (1.00-1.25)               | 3.0         | 2.8  | 1.07 (0.99-1.15)               | 8.8         | 7.8  | <b>1.13 (1.08-1.18)</b>        | 24.9        | 23.1 | <b>1.08 (1.05-1.11)</b>        | 54.1        | 58.8  | <b>0.92 (0.91-0.94)</b>        |
| 2010-14/1995-99 IRR (95% CI) |             |      |                                |             |      |                                |             |      |                                |             |      |                                |             |       |                                |
| Male                         |             |      | <b>0.73 (0.65-0.81)</b>        |             |      | <b>0.53 (0.50-0.57)</b>        |             |      | <b>0.49 (0.47-0.51)</b>        |             |      | <b>0.63 (0.62-0.65)</b>        |             |       | <b>0.71 (0.69-0.72)</b>        |
| Female                       |             |      | <b>0.83 (0.75-0.93)</b>        |             |      | <b>0.57 (0.53-0.61)</b>        |             |      | <b>0.69 (0.66-0.71)</b>        |             |      | <b>0.92 (0.90-0.95)</b>        |             |       | <b>0.92 (0.90-0.94)</b>        |
| <b>WHITE</b>                 |             |      |                                |             |      |                                |             |      |                                |             |      |                                |             |       |                                |
| 1995-99                      | 1.8         | 1.7  | 1.06 (0.93-1.20)               | 5.5         | 5.2  | 1.06 (0.99-1.13)               | 13.4        | 15.2 | <b>0.88 (0.84-0.92)</b>        | 28.5        | 35.3 | <b>0.81 (0.78-0.83)</b>        | 63.5        | 82.4  | <b>0.77 (0.75-0.79)</b>        |
| 2000-04                      | 1.5         | 1.5  | 1.02 (0.89-1.16)               | 5.3         | 4.7  | <b>1.14 (1.06-1.22)</b>        | 15.3        | 15.1 | 1.02 (0.98-1.05)               | 29.8        | 34.9 | <b>0.85 (0.83-0.88)</b>        | 54.9        | 72.1  | <b>0.76 (0.75-0.78)</b>        |
| 2005-09                      | 1.6         | 1.4  | 1.11 (0.96-1.27)               | 4.3         | 3.7  | <b>1.15 (1.06-1.25)</b>        | 13.7        | 12.2 | <b>1.13 (1.08-1.18)</b>        | 34.1        | 32.7 | <b>1.04 (1.02-1.07)</b>        | 57.6        | 68.4  | <b>0.84 (0.83-0.86)</b>        |
| 2010-14                      | 1.4         | 1.1  | <b>1.27 (1.09-1.48)</b>        | 3.5         | 3.0  | <b>1.16 (1.05-1.27)</b>        | 10.5        | 9.0  | <b>1.17 (1.11-1.23)</b>        | 29.0        | 25.7 | <b>1.13 (1.09-1.16)</b>        | 60.6        | 62.8  | <b>0.97 (0.95-0.98)</b>        |
| 2010-14/1995-99 IRR (95% CI) |             |      |                                |             |      |                                |             |      |                                |             |      |                                |             |       |                                |
| Male                         |             |      | <b>0.66 (0.57-0.76)</b>        |             |      | <b>0.58 (0.53-0.63)</b>        |             |      | <b>0.59 (0.56-0.62)</b>        |             |      | <b>0.73 (0.71-0.75)</b>        |             |       | <b>0.76 (0.75-0.78)</b>        |
| Female                       |             |      | <b>0.79 (0.69-0.90)</b>        |             |      | <b>0.63 (0.59-0.69)</b>        |             |      | <b>0.79 (0.75-0.82)</b>        |             |      | 1.02 (0.99-1.05)               |             |       | <b>0.95 (0.93-0.97)</b>        |
| <b>BLACK</b>                 |             |      |                                |             |      |                                |             |      |                                |             |      |                                |             |       |                                |
| 1995-99                      | 1.6         | 2.3  | <b>0.70 (0.52-0.94)</b>        | 7.4         | 9.5  | <b>0.78 (0.68-0.90)</b>        | 18.3        | 31   | <b>0.59 (0.54-0.64)</b>        | 35.4        | 72.1 | <b>0.49 (0.46-0.52)</b>        | 68.9        | 150.6 | <b>0.46 (0.43-0.48)</b>        |
| 2000-04                      | 1.4         | 1.4  | 1.01 (0.74-1.40)               | 5.3         | 5.9  | 0.89 (0.76-1.04)               | 18.2        | 25.5 | <b>0.72 (0.66-0.77)</b>        | 37.2        | 60.6 | <b>0.61 (0.58-0.65)</b>        | 61.7        | 120.9 | <b>0.51 (0.49-0.53)</b>        |
| 2005-09                      | 1.4         | 1.6  | 0.92 (0.68-1.26)               | 3.8         | 3.7  | 1.03 (0.85-1.24)               | 13.5        | 15.1 | <b>0.89 (0.81-0.98)</b>        | 38.5        | 49.3 | <b>0.78 (0.74-0.82)</b>        | 64.8        | 106.2 | <b>0.61 (0.59-0.64)</b>        |
| 2010-14                      | 1.2         | 2.0  | <b>0.61 (0.46-0.81)</b>        | 2.6         | 3.2  | <b>0.79 (0.63-0.98)</b>        | 8.3         | 9.1  | 0.91 (0.81-1.03)               | 26.6        | 31.0 | <b>0.86 (0.80-0.92)</b>        | 62.6        | 84.9  | <b>0.74 (0.71-0.77)</b>        |
| 2010-14/1995-99 IRR (95% CI) |             |      |                                |             |      |                                |             |      |                                |             |      |                                |             |       |                                |
| Male                         |             |      | 0.90 (0.69-1.17)               |             |      | <b>0.34 (0.29-0.41)</b>        |             |      | <b>0.29 (0.26-0.32)</b>        |             |      | <b>0.43 (0.41-0.46)</b>        |             |       | <b>0.56 (0.54-0.59)</b>        |
| Female                       |             |      | 0.79 (0.57-1.08)               |             |      | <b>0.35 (0.29-0.42)</b>        |             |      | <b>0.45 (0.41-0.50)</b>        |             |      | <b>0.75 (0.70-0.81)</b>        |             |       | <b>0.91 (0.86-0.96)</b>        |

| <b>ASIAN/PACIFIC ISLANDER</b> |     |     |                         |     |     |                         |     |     |                         |      |      |                         |      |      |                         |
|-------------------------------|-----|-----|-------------------------|-----|-----|-------------------------|-----|-----|-------------------------|------|------|-------------------------|------|------|-------------------------|
| 1995-99                       | 1.4 | 1.3 | 1.10 (0.63-1.93)        | 3.0 | 3.5 | 0.84 (0.59-1.20)        | 6.9 | 9.6 | <b>0.71 (0.56-0.90)</b> | 13.6 | 18.5 | <b>0.74 (0.62-0.88)</b> | 23.0 | 41.3 | <b>0.56 (0.48-0.64)</b> |
| 2000-04                       | 1.3 | 1.7 | 0.76 (0.47-1.20)        | 3.3 | 3.7 | 0.88 (0.65-1.20)        | 7.1 | 8.4 | 0.84 (0.68-1.04)        | 13.0 | 17.9 | <b>0.73 (0.62-0.85)</b> | 24.0 | 36.1 | <b>0.67 (0.59-0.75)</b> |
| 2005-09                       | 1.6 | 1.3 | 1.25 (0.81-1.95)        | 3.1 | 3.6 | 0.87 (0.66-1.15)        | 6.6 | 7.0 | 0.95 (0.77-1.17)        | 13.7 | 16.9 | <b>0.81 (0.70-0.94)</b> | 24.8 | 34.4 | <b>0.72 (0.65-0.80)</b> |
| 2010-14                       | 1.3 | 0.9 | 1.37 (0.86-2.23)        | 3.0 | 2.5 | 1.18 (0.87-1.59)        | 6.3 | 6.1 | 1.05 (0.86-1.28)        | 13.9 | 14.8 | 0.94 (0.82-1.08)        | 24.7 | 31.7 | <b>0.78 (0.70-0.86)</b> |
| 2010-14/1995-99 IRR (95% CI)  |     |     |                         |     |     |                         |     |     |                         |      |      |                         |      |      |                         |
| Male                          |     |     | 0.73 (0.42-1.28)        |     |     | 0.72 (0.51-1.00)        |     |     | <b>0.63 (0.51-0.78)</b> |      |      | <b>0.80 (0.68-0.93)</b> |      |      | <b>0.77 (0.68-0.86)</b> |
| Female                        |     |     | 0.91 (0.57-1.48)        |     |     | 1.00 (0.73-1.39)        |     |     | 0.93 (0.74-1.16)        |      |      | 1.02 (0.87-1.20)        |      |      | 1.07 (0.94-1.24)        |
| <b>HISPANIC</b>               |     |     |                         |     |     |                         |     |     |                         |      |      |                         |      |      |                         |
| 1995-99                       | 0.7 | 1.0 | 0.74 (0.49-1.09)        | 2.8 | 2.7 | 1.04 (0.83-1.30)        | 6.1 | 7.8 | <b>0.79 (0.67-0.92)</b> | 12.2 | 19.2 | <b>0.64 (0.56-0.72)</b> | 25.1 | 42.3 | <b>0.59 (0.54-0.65)</b> |
| 2000-04                       | 0.7 | 0.9 | 0.75 (0.52-1.07)        | 2.1 | 2.0 | 1.01 (0.80-1.28)        | 6.3 | 5.7 | 1.10 (0.96-1.28)        | 12.4 | 14.2 | <b>0.87 (0.78-0.98)</b> | 23.4 | 34.8 | <b>0.67 (0.62-0.73)</b> |
| 2005-09                       | 1.0 | 0.7 | <b>1.49 (1.07-2.08)</b> | 2.0 | 1.7 | 1.16 (0.92-1.45)        | 5.1 | 4.8 | 1.06 (0.91-1.22)        | 12.2 | 11.2 | 1.09 (0.98-1.20)        | 23.5 | 28.3 | <b>0.83 (0.77-0.90)</b> |
| 2010-14                       | 1.0 | 0.8 | 1.27 (0.94-1.72)        | 1.8 | 2.0 | 0.91 (0.74-1.12)        | 3.8 | 3.1 | <b>1.22 (1.04-1.44)</b> | 9.3  | 8.4  | <b>1.12 (1.00-1.25)</b> | 20.3 | 21.0 | 0.97 (0.90-1.04)        |
| 2010-14/1995-99 IRR (95% CI)  |     |     |                         |     |     |                         |     |     |                         |      |      |                         |      |      |                         |
| Male                          |     |     | 0.82 (0.59-1.15)        |     |     | <b>0.74 (0.60-0.91)</b> |     |     | <b>0.40 (0.34-0.47)</b> |      |      | <b>0.43 (0.39-0.48)</b> |      |      | <b>0.50 (0.46-0.54)</b> |
| Female                        |     |     | 1.14 (0.98-2.06)        |     |     | <b>0.65 (0.52-0.81)</b> |     |     | <b>0.63 (0.53-0.74)</b> |      |      | <b>0.76 (0.68-0.86)</b> |      |      | <b>0.81 (0.74-0.89)</b> |

White, black, and Asian/Pacific Islander race exclude persons of Hispanic ethnicity. Reference group is males for female-to-male IRRs and diagnosis years 1995-99 for 2010-14/1995-99 IRRs. IRRs were calculated using unrounded rates. Bold indicates the IRR is significantly different from 1.00 ( $p < 0.05$ ). Rates are per 100,000 person-years.

**Table S3.** Age-specific lung cancer incidence rates and rate ratios (IRRs) by sex and cohort year of birth

|                                     | 30-34 years |      |                                | 35-39 years |      |                                | 40-44 years |      |                                | 45-49 years |      |                                | 50-54 years |       |                                |
|-------------------------------------|-------------|------|--------------------------------|-------------|------|--------------------------------|-------------|------|--------------------------------|-------------|------|--------------------------------|-------------|-------|--------------------------------|
|                                     | Rate        |      | Female-to-male<br>IRR (95% CI) | Rate        |       | Female-to-male<br>IRR (95% CI) |
|                                     | Female      | Male |                                | Female      | Male |                                | Female      | Male |                                | Female      | Male |                                | Female      | Male  |                                |
| <b>A. RACE/ETHNICITY</b>            |             |      |                                |             |      |                                |             |      |                                |             |      |                                |             |       |                                |
| <b>ALL RACES</b>                    |             |      |                                |             |      |                                |             |      |                                |             |      |                                |             |       |                                |
| 1945                                |             |      |                                |             |      |                                |             |      |                                |             |      |                                | 58.9        | 83.3  | <b>0.71 (0.69-0.72)</b>        |
| 1950                                |             |      |                                |             |      |                                |             |      |                                | 27.0        | 36.5 | <b>0.74 (0.72-0.76)</b>        | 51.4        | 72.1  | <b>0.71 (0.70-0.73)</b>        |
| 1955                                |             |      |                                |             |      |                                | 12.9        | 15.8 | <b>0.82 (0.79-0.85)</b>        | 28.2        | 34.8 | <b>0.81 (0.79-0.83)</b>        | 53.3        | 67.0  | <b>0.80 (0.78-0.81)</b>        |
| 1960                                |             |      |                                | 5.3         | 5.3  | 1.00 (0.94-1.06)               | 14.2        | 14.8 | <b>0.96 (0.93-0.99)</b>        | 31.0        | 31.2 | 0.99 (0.97-1.01)               | 54.1        | 58.8  | <b>0.92 (0.91-0.94)</b>        |
| 1965                                | 1.6         | 1.6  | 0.98 (0.87-1.09)               | 4.7         | 4.4  | <b>1.08 (1.02-1.15)</b>        | 12.0        | 11.1 | <b>1.08 (1.04-1.12)</b>        | 24.9        | 23.1 | <b>1.08 (1.05-1.11)</b>        |             |       |                                |
| 1970                                | 1.4         | 1.4  | 0.98 (0.88-1.10)               | 3.8         | 3.4  | <b>1.13 (1.05-1.20)</b>        | 8.8         | 7.8  | <b>1.13 (1.08-1.18)</b>        |             |      |                                |             |       |                                |
| 1975                                | 1.5         | 1.3  | <b>1.15 (1.02-1.28)</b>        | 3.0         | 2.8  | 1.07 (0.99-1.15)               |             |      |                                |             |      |                                |             |       |                                |
| 1980                                | 1.3         | 1.2  | 1.12 (1.00-1.25)               |             |      |                                |             |      |                                |             |      |                                |             |       |                                |
| Youngest/oldest cohort IRR (95% CI) |             |      |                                |             |      |                                |             |      |                                |             |      |                                |             |       |                                |
| Male                                |             |      | <b>0.73 (0.65-0.81)</b>        |             |      | <b>0.53 (0.50-0.57)</b>        |             |      | <b>0.49 (0.47-0.51)</b>        |             |      | <b>0.63 (0.62-0.65)</b>        |             |       | <b>0.71 (0.69-0.72)</b>        |
| Female                              |             |      | <b>0.83 (0.75-0.93)</b>        |             |      | <b>0.57 (0.53-0.61)</b>        |             |      | <b>0.69 (0.66-0.71)</b>        |             |      | <b>0.92 (0.90-0.95)</b>        |             |       | <b>0.92 (0.90-0.94)</b>        |
| <b>WHITE</b>                        |             |      |                                |             |      |                                |             |      |                                |             |      |                                |             |       |                                |
| 1945                                |             |      |                                |             |      |                                |             |      |                                |             |      |                                | 63.5        | 82.4  | <b>0.77 (0.75-0.79)</b>        |
| 1950                                |             |      |                                |             |      |                                |             |      |                                | 28.5        | 35.3 | <b>0.81 (0.78-0.83)</b>        | 54.9        | 72.1  | <b>0.76 (0.75-0.78)</b>        |
| 1955                                |             |      |                                |             |      |                                | 13.4        | 15.2 | <b>0.88 (0.84-0.92)</b>        | 29.8        | 34.9 | <b>0.85 (0.83-0.88)</b>        | 57.6        | 68.4  | <b>0.84 (0.83-0.86)</b>        |
| 1960                                |             |      |                                | 5.5         | 5.2  | 1.06 (0.99-1.13)               | 15.3        | 15.1 | 1.02 (0.98-1.05)               | 34.1        | 32.7 | <b>1.04 (1.02-1.07)</b>        | 60.6        | 62.8  | <b>0.97 (0.95-0.98)</b>        |
| 1965                                | 1.8         | 1.7  | 1.06 (0.93-1.20)               | 5.3         | 4.7  | <b>1.14 (1.06-1.22)</b>        | 13.7        | 12.2 | <b>1.13 (1.08-1.18)</b>        | 29.0        | 25.7 | <b>1.13 (1.09-1.16)</b>        |             |       |                                |
| 1970                                | 1.5         | 1.5  | 1.02 (0.89-1.16)               | 4.3         | 3.7  | <b>1.15 (1.06-1.25)</b>        | 10.5        | 9.0  | <b>1.17 (1.11-1.23)</b>        |             |      |                                |             |       |                                |
| 1975                                | 1.6         | 1.4  | 1.11 (0.96-1.27)               | 3.5         | 3.0  | <b>1.16 (1.05-1.27)</b>        |             |      |                                |             |      |                                |             |       |                                |
| 1980                                | 1.4         | 1.1  | <b>1.27 (1.09-1.48)</b>        |             |      |                                |             |      |                                |             |      |                                |             |       |                                |
| Youngest/oldest cohort IRR (95% CI) |             |      |                                |             |      |                                |             |      |                                |             |      |                                |             |       |                                |
| Male                                |             |      | <b>0.66 (0.57-0.76)</b>        |             |      | <b>0.58 (0.53-0.63)</b>        |             |      | <b>0.59 (0.56-0.62)</b>        |             |      | <b>0.73 (0.71-0.75)</b>        |             |       | <b>0.76 (0.75-0.78)</b>        |
| Female                              |             |      | <b>0.79 (0.69-0.90)</b>        |             |      | <b>0.63 (0.59-0.69)</b>        |             |      | <b>0.79 (0.75-0.82)</b>        |             |      | 1.02 (0.99-1.05)               |             |       | <b>0.95 (0.93-0.97)</b>        |
| <b>BLACK</b>                        |             |      |                                |             |      |                                |             |      |                                |             |      |                                |             |       |                                |
| 1945                                |             |      |                                |             |      |                                |             |      |                                |             |      |                                | 68.9        | 150.6 | <b>0.46 (0.43-0.48)</b>        |
| 1950                                |             |      |                                |             |      |                                |             |      |                                | 35.4        | 72.1 | <b>0.49 (0.46-0.52)</b>        | 61.7        | 120.9 | <b>0.51 (0.49-0.53)</b>        |

|                                     |     |     |                         |     |     |                         |      |      |                         |      |      |                         |      |       |                         |
|-------------------------------------|-----|-----|-------------------------|-----|-----|-------------------------|------|------|-------------------------|------|------|-------------------------|------|-------|-------------------------|
| 1955                                |     |     |                         |     |     |                         | 18.3 | 31.0 | <b>0.59 (0.54-0.64)</b> | 37.2 | 60.6 | <b>0.61 (0.58-0.65)</b> | 64.8 | 106.2 | <b>0.61 (0.59-0.64)</b> |
| 1960                                |     |     |                         | 7.4 | 9.5 | <b>0.78 (0.68-0.90)</b> | 18.2 | 25.5 | <b>0.72 (0.66-0.77)</b> | 38.5 | 49.3 | <b>0.78 (0.74-0.82)</b> | 62.6 | 84.9  | <b>0.74 (0.71-0.77)</b> |
| 1965                                | 1.6 | 2.3 | <b>0.70 (0.52-0.94)</b> | 5.3 | 5.9 | 0.89 (0.76-1.04)        | 13.5 | 15.1 | <b>0.89 (0.81-0.98)</b> | 26.6 | 31.0 | <b>0.86 (0.80-0.92)</b> |      |       |                         |
| 1970                                | 1.4 | 1.4 | 1.01 (0.74-1.40)        | 3.8 | 3.7 | 1.03 (0.85-1.24)        | 8.3  | 9.1  | 0.91 (0.81-1.03)        |      |      |                         |      |       |                         |
| 1975                                | 1.4 | 1.6 | 0.92 (0.68-1.26)        | 2.6 | 3.2 | <b>0.79 (0.63-0.98)</b> |      |      |                         |      |      |                         |      |       |                         |
| 1980                                | 1.2 | 2.0 | <b>0.61 (0.46-0.81)</b> |     |     |                         |      |      |                         |      |      |                         |      |       |                         |
| Youngest/oldest cohort IRR (95% CI) |     |     |                         |     |     |                         |      |      |                         |      |      |                         |      |       |                         |
| Male                                |     |     | 0.90 (0.69-1.17)        |     |     | <b>0.34 (0.29-0.41)</b> |      |      | <b>0.29 (0.26-0.32)</b> |      |      | <b>0.43 (0.41-0.46)</b> |      |       | <b>0.56 (0.54-0.59)</b> |
| Female                              |     |     | 0.79 (0.57-1.08)        |     |     | <b>0.35 (0.29-0.42)</b> |      |      | <b>0.45 (0.41-0.50)</b> |      |      | <b>0.75 (0.70-0.81)</b> |      |       | <b>0.91 (0.86-0.96)</b> |
| <b>ASIAN/PACIFIC ISLANDER</b>       |     |     |                         |     |     |                         |      |      |                         |      |      |                         |      |       |                         |
| 1945                                |     |     |                         |     |     |                         |      |      |                         |      |      |                         | 23.0 | 41.3  | <b>0.56 (0.48-0.64)</b> |
| 1950                                |     |     |                         |     |     |                         |      |      |                         | 13.6 | 18.5 | <b>0.74 (0.62-0.88)</b> | 24.0 | 36.1  | <b>0.67 (0.59-0.75)</b> |
| 1955                                |     |     |                         |     |     |                         | 6.9  | 9.6  | <b>0.71 (0.56-0.90)</b> | 13.0 | 17.9 | <b>0.73 (0.62-0.85)</b> | 24.8 | 34.4  | <b>0.72 (0.65-0.80)</b> |
| 1960                                |     |     |                         | 3.0 | 3.5 | 0.84 (0.59-1.20)        | 7.1  | 8.4  | 0.84 (0.68-1.04)        | 13.7 | 16.9 | <b>0.81 (0.70-0.94)</b> | 24.7 | 31.7  | <b>0.78 (0.70-0.86)</b> |
| 1965                                | 1.4 | 1.3 | 1.10 (0.63-1.93)        | 3.3 | 3.7 | 0.88 (0.65-1.20)        | 6.6  | 7.0  | 0.95 (0.77-1.17)        | 13.9 | 14.8 | 0.94 (0.82-1.08)        |      |       |                         |
| 1970                                | 1.3 | 1.7 | 0.76 (0.47-1.20)        | 3.1 | 3.6 | 0.87 (0.66-1.15)        | 6.3  | 6.1  | 1.05 (0.86-1.28)        |      |      |                         |      |       |                         |
| 1975                                | 1.6 | 1.3 | 1.25 (0.81-1.95)        | 3.0 | 2.5 | 1.18 (0.87-1.59)        |      |      |                         |      |      |                         |      |       |                         |
| 1980                                | 1.3 | 0.9 | 1.37 (0.86-2.23)        |     |     |                         |      |      |                         |      |      |                         |      |       |                         |
| Youngest/oldest cohort IRR (95% CI) |     |     |                         |     |     |                         |      |      |                         |      |      |                         |      |       |                         |
| Male                                |     |     | 0.73 (0.42-1.28)        |     |     | 0.72 (0.51-1.00)        |      |      | <b>0.63 (0.51-0.78)</b> |      |      | <b>0.80 (0.68-0.93)</b> |      |       | <b>0.77 (0.68-0.86)</b> |
| Female                              |     |     | 0.91 (0.57-1.48)        |     |     | 1.00 (0.73-1.39)        |      |      | 0.93 (0.74-1.16)        |      |      | 1.02 (0.87-1.20)        |      |       | 1.07 (0.94-1.24)        |
| <b>HISPANIC</b>                     |     |     |                         |     |     |                         |      |      |                         |      |      |                         |      |       |                         |
| 1945                                |     |     |                         |     |     |                         |      |      |                         |      |      |                         | 25.1 | 42.3  | <b>0.59 (0.54-0.65)</b> |
| 1950                                |     |     |                         |     |     |                         |      |      |                         | 12.2 | 19.2 | <b>0.64 (0.56-0.72)</b> | 23.4 | 34.8  | <b>0.67 (0.62-0.73)</b> |
| 1955                                |     |     |                         |     |     |                         | 6.1  | 7.8  | <b>0.79 (0.67-0.92)</b> | 12.4 | 14.2 | <b>0.87 (0.78-0.98)</b> | 23.5 | 28.3  | <b>0.83 (0.77-0.90)</b> |
| 1960                                |     |     |                         | 2.8 | 2.7 | 1.04 (0.83-1.30)        | 6.3  | 5.7  | 1.10 (0.96-1.28)        | 12.2 | 11.2 | 1.09 (0.98-1.20)        | 20.3 | 21.0  | 0.97 (0.90-1.04)        |
| 1965                                | 0.7 | 1.0 | 0.74 (0.49-1.09)        | 2.1 | 2.0 | 1.01 (0.80-1.28)        | 5.1  | 4.8  | 1.06 (0.91-1.22)        | 9.3  | 8.4  | <b>1.12 (1.00-1.25)</b> |      |       |                         |
| 1970                                | 0.7 | 0.9 | 0.75 (0.52-1.07)        | 2.0 | 1.7 | 1.16 (0.92-1.45)        | 3.8  | 3.1  | <b>1.22 (1.04-1.44)</b> |      |      |                         |      |       |                         |
| 1975                                | 1.0 | 0.7 | <b>1.49 (1.07-2.08)</b> | 1.8 | 2.0 | 0.91 (0.74-1.12)        |      |      |                         |      |      |                         |      |       |                         |
| 1980                                | 1.0 | 0.8 | 1.27 (0.94-1.72)        |     |     |                         |      |      |                         |      |      |                         |      |       |                         |
| Youngest/oldest cohort IRR (95% CI) |     |     |                         |     |     |                         |      |      |                         |      |      |                         |      |       |                         |
| Male                                |     |     | 0.82 (0.59-1.15)        |     |     | <b>0.74 (0.60-0.91)</b> |      |      | <b>0.40 (0.34-0.47)</b> |      |      | <b>0.43 (0.39-0.48)</b> |      |       | <b>0.50 (0.46-0.54)</b> |

|                                     |     |     |                         |     |     |                         |     |     |                         |      |      |                         |      |      |                         |
|-------------------------------------|-----|-----|-------------------------|-----|-----|-------------------------|-----|-----|-------------------------|------|------|-------------------------|------|------|-------------------------|
| Female                              |     |     | 1.14 (0.98-2.06)        |     |     | <b>0.65 (0.52-0.81)</b> |     |     | <b>0.63 (0.53-0.74)</b> |      |      | <b>0.76 (0.68-0.86)</b> |      |      | <b>0.81 (0.74-0.89)</b> |
| <b>B. HISTOLOGY TYPE (WHITES)</b>   |     |     |                         |     |     |                         |     |     |                         |      |      |                         |      |      |                         |
| <b>ADENOCARCINOMA</b>               |     |     |                         |     |     |                         |     |     |                         |      |      |                         |      |      |                         |
| 1945                                |     |     |                         |     |     |                         |     |     |                         |      |      |                         | 25.8 | 26.0 | 0.99 (0.96-1.03)        |
| 1950                                |     |     |                         |     |     |                         |     |     |                         | 12.6 | 11.9 | <b>1.06 (1.01-1.11)</b> | 21.2 | 21.3 | 0.99 (0.96-1.03)        |
| 1955                                |     |     |                         |     |     |                         | 5.8 | 5.4 | <b>1.07 (1.00-1.15)</b> | 12.0 | 10.6 | <b>1.13 (1.08-1.18)</b> | 23.6 | 21.2 | <b>1.11 (1.08-1.15)</b> |
| 1960                                |     |     |                         | 2.2 | 1.9 | <b>1.16 (1.04-1.30)</b> | 6.4 | 4.9 | <b>1.32 (1.24-1.40)</b> | 14.8 | 10.7 | <b>1.38 (1.32-1.44)</b> | 30.1 | 24.1 | <b>1.25 (1.21-1.28)</b> |
| 1965                                | 0.6 | 0.6 | 1.05 (0.85-1.30)        | 2.2 | 1.5 | <b>1.49 (1.33-1.68)</b> | 6.1 | 4.0 | <b>1.53 (1.43-1.64)</b> | 15.0 | 9.9  | <b>1.51 (1.45-1.58)</b> |      |      |                         |
| 1970                                | 0.6 | 0.5 | <b>1.27 (1.01-1.59)</b> | 1.9 | 1.3 | <b>1.46 (1.28-1.67)</b> | 5.6 | 3.8 | <b>1.48 (1.38-1.60)</b> |      |      |                         |      |      |                         |
| 1975                                | 0.6 | 0.4 | 1.27 (0.99-1.63)        | 1.7 | 1.3 | <b>1.34 (1.17-1.54)</b> |     |     |                         |      |      |                         |      |      |                         |
| 1980                                | 0.5 | 0.4 | <b>1.29 (1.00-1.66)</b> |     |     |                         |     |     |                         |      |      |                         |      |      |                         |
| Youngest/oldest cohort IRR (95% CI) |     |     |                         |     |     |                         |     |     |                         |      |      |                         |      |      |                         |
| Male                                |     |     | <b>0.66 (0.52-0.84)</b> |     |     | <b>0.67 (0.59-0.77)</b> |     |     | <b>0.71 (0.66-0.76)</b> |      |      | <b>0.83 (0.79-0.87)</b> |      |      | <b>0.93 (0.90-0.96)</b> |
| Female                              |     |     | 0.81 (0.65-1.01)        |     |     | <b>0.78 (0.69-0.87)</b> |     |     | 0.98 (0.91-1.04)        |      |      | <b>1.19 (1.14-1.24)</b> |      |      | <b>1.17 (1.13-1.20)</b> |
| <b>SQUAMOUS CELL CARCINOMA</b>      |     |     |                         |     |     |                         |     |     |                         |      |      |                         |      |      |                         |
| 1945                                |     |     |                         |     |     |                         |     |     |                         |      |      |                         | 7.5  | 17.7 | <b>0.43 (0.40-0.45)</b> |
| 1950                                |     |     |                         |     |     |                         |     |     |                         | 3.1  | 6.8  | <b>0.45 (0.42-0.49)</b> | 5.7  | 14.2 | <b>0.40 (0.38-0.42)</b> |
| 1955                                |     |     |                         |     |     |                         | 1.3 | 2.6 | <b>0.51 (0.45-0.58)</b> | 2.6  | 6.3  | <b>0.42 (0.39-0.46)</b> | 6.1  | 13.9 | <b>0.44 (0.42-0.47)</b> |
| 1960                                |     |     |                         | 0.5 | 0.7 | <b>0.70 (0.57-0.86)</b> | 1.3 | 2.3 | <b>0.58 (0.52-0.65)</b> | 3.2  | 5.8  | <b>0.54 (0.51-0.58)</b> | 6.9  | 14.2 | <b>0.49 (0.47-0.51)</b> |
| 1965                                | 0.1 | 0.1 | 0.85 (0.52-1.36)        | 0.4 | 0.6 | <b>0.66 (0.52-0.83)</b> | 1.2 | 2.0 | <b>0.62 (0.54-0.70)</b> | 2.8  | 5.4  | <b>0.52 (0.48-0.56)</b> |      |      |                         |
| 1970                                | 0.1 | 0.1 | 0.77 (0.48-1.22)        | 0.3 | 0.4 | <b>0.72 (0.54-0.95)</b> | 0.9 | 1.6 | <b>0.55 (0.47-0.64)</b> |      |      |                         |      |      |                         |
| 1975                                | 0.1 | 0.1 | 0.93 (0.56-1.55)        | 0.2 | 0.4 | <b>0.54 (0.38-0.76)</b> |     |     |                         |      |      |                         |      |      |                         |
| 1980                                | 0.1 | 0.1 | 0.71 (0.38-1.33)        |     |     |                         |     |     |                         |      |      |                         |      |      |                         |
| Youngest/oldest cohort IRR (95% CI) |     |     |                         |     |     |                         |     |     |                         |      |      |                         |      |      |                         |
| Male                                |     |     | 0.64 (0.38-1.07)        |     |     | <b>0.50 (0.39-0.64)</b> |     |     | <b>0.62 (0.55-0.69)</b> |      |      | <b>0.79 (0.74-0.85)</b> |      |      | <b>0.80 (0.77-0.84)</b> |
| Female                              |     |     | <b>0.54 (0.29-0.98)</b> |     |     | <b>0.39 (0.28-0.53)</b> |     |     | <b>0.67 (0.57-0.78)</b> |      |      | <b>0.90 (0.82-0.99)</b> |      |      | <b>0.92 (0.87-0.98)</b> |
| <b>SMALL CELL CARCINOMA</b>         |     |     |                         |     |     |                         |     |     |                         |      |      |                         |      |      |                         |
| 1945                                |     |     |                         |     |     |                         |     |     |                         |      |      |                         | 12.2 | 13.8 | <b>0.89 (0.84-0.93)</b> |
| 1950                                |     |     |                         |     |     |                         |     |     |                         | 4.8  | 5.7  | <b>0.83 (0.77-0.90)</b> | 10.2 | 12.0 | <b>0.85 (0.82-0.90)</b> |
| 1955                                |     |     |                         |     |     |                         | 2.0 | 2.2 | 0.91 (0.82-1.02)        | 5.2  | 5.7  | <b>0.92 (0.87-0.98)</b> | 10.8 | 11.2 | 0.97 (0.92-1.01)        |
| 1960                                |     |     |                         | 0.6 | 0.6 | 0.99 (0.81-1.21)        | 2.2 | 2.3 | 0.98 (0.89-1.09)        | 5.8  | 5.2  | <b>1.12 (1.05-1.19)</b> | 10.9 | 9.8  | <b>1.11 (1.06-1.16)</b> |
| 1965                                | 0.2 | 0.2 | 0.99 (0.65-1.52)        | 0.6 | 0.6 | 1.13 (0.92-1.38)        | 1.8 | 1.7 | 1.02 (0.91-1.14)        | 4.7  | 3.9  | <b>1.19 (1.11-1.28)</b> |      |      |                         |



|                                     |      |      |                         |     |     |                         |     |     |                         |     |     |                         |     |      |                         |
|-------------------------------------|------|------|-------------------------|-----|-----|-------------------------|-----|-----|-------------------------|-----|-----|-------------------------|-----|------|-------------------------|
| 1970                                | 0.1  | 0.1  | 0.79 (0.48-1.29)        | 0.4 | 0.5 | 0.83 (0.65-1.07)        | 1.3 | 1.2 | 1.13 (0.98-1.31)        |     |     |                         |     |      |                         |
| 1975                                | 0.1  | 0.1  | 0.81 (0.46-1.44)        | 0.3 | 0.3 | 1.05 (0.77-1.44)        |     |     |                         |     |     |                         |     |      |                         |
| 1980                                | 0.1  | <0.1 | 1.45 (0.70-3.11)        |     |     |                         |     |     |                         |     |     |                         |     |      |                         |
| Youngest/oldest cohort IRR (95% CI) |      |      |                         |     |     |                         |     |     |                         |     |     |                         |     |      |                         |
| Male                                |      |      | <b>0.29 (0.15-0.54)</b> |     |     | <b>0.47 (0.36-0.61)</b> |     |     | <b>0.54 (0.48-0.62)</b> |     |     | <b>0.69 (0.64-0.74)</b> |     |      | <b>0.71 (0.68-0.74)</b> |
| Female                              |      |      | <b>0.43 (0.24-0.73)</b> |     |     | <b>0.50 (0.38-0.65)</b> |     |     | <b>0.67 (0.59-0.76)</b> |     |     | 0.99 (0.92-1.06)        |     |      | <b>0.89 (0.85-0.93)</b> |
| <b>LARGE CELL CARCINOMA</b>         |      |      |                         |     |     |                         |     |     |                         |     |     |                         |     |      |                         |
| 1945                                |      |      |                         |     |     |                         |     |     |                         |     |     |                         | 4.9 | 6.4  | <b>0.76 (0.70-0.82)</b> |
| 1950                                |      |      |                         |     |     |                         |     |     |                         | 2.1 | 2.9 | <b>0.73 (0.66-0.82)</b> | 2.7 | 3.8  | <b>0.72 (0.66-0.79)</b> |
| 1955                                |      |      |                         |     |     |                         | 1.1 | 1.4 | <b>0.84 (0.73-0.97)</b> | 1.4 | 1.9 | <b>0.74 (0.66-0.84)</b> | 1.8 | 2.4  | <b>0.76 (0.69-0.84)</b> |
| 1960                                |      |      |                         | 0.5 | 0.5 | 1.02 (0.82-1.27)        | 0.9 | 0.9 | 1.01 (0.86-1.18)        | 1.1 | 1.2 | 0.97 (0.85-1.11)        | 1.1 | 1.4  | <b>0.77 (0.67-0.88)</b> |
| 1965                                | 0.1  | 0.1  | 1.01 (0.64-1.61)        | 0.3 | 0.3 | 0.99 (0.75-1.30)        | 0.5 | 0.5 | 0.98 (0.79-1.22)        | 0.6 | 0.6 | 0.88 (0.72-1.07)        |     |      |                         |
| 1970                                | 0.1  | 0.1  | 0.73 (0.35-1.48)        | 0.1 | 0.2 | 0.68 (0.44-1.05)        | 0.2 | 0.2 | 1.16 (0.82-1.65)        |     |     |                         |     |      |                         |
| 1975                                | <0.1 | <0.1 | 1.02 (0.42-2.48)        | 0.1 | 0.1 | 0.73 (0.37-1.39)        |     |     |                         |     |     |                         |     |      |                         |
| 1980                                | <0.1 | --   | --                      |     |     |                         |     |     |                         |     |     |                         |     |      |                         |
| Youngest/oldest cohort IRR (95% CI) |      |      |                         |     |     |                         |     |     |                         |     |     |                         |     |      |                         |
| Male                                |      |      | --                      |     |     | <b>0.17 (0.11-0.26)</b> |     |     | <b>0.16 (0.12-0.20)</b> |     |     | <b>0.22 (0.19-0.26)</b> |     |      | <b>0.22 (0.20-0.24)</b> |
| Female                              |      |      | <b>0.18 (0.07-0.40)</b> |     |     | <b>0.12 (0.07-0.20)</b> |     |     | <b>0.22 (0.17-0.28)</b> |     |     | <b>0.26 (0.22-0.31)</b> |     |      | <b>0.22 (0.20-0.25)</b> |
| <b>OTHER SPECIFIED CARCINOMAS</b>   |      |      |                         |     |     |                         |     |     |                         |     |     |                         |     |      |                         |
| 1945                                |      |      |                         |     |     |                         |     |     |                         |     |     |                         | 3.2 | 2.8  | <b>1.15 (1.04-1.28)</b> |
| 1950                                |      |      |                         |     |     |                         |     |     |                         | 1.7 | 1.4 | <b>1.18 (1.03-1.35)</b> | 3.0 | 2.4  | <b>1.24 (1.12-1.36)</b> |
| 1955                                |      |      |                         |     |     |                         | 1.0 | 0.9 | 1.11 (0.94-1.31)        | 1.9 | 1.4 | <b>1.41 (1.25-1.59)</b> | 3.3 | 2.5  | <b>1.35 (1.24-1.48)</b> |
| 1960                                |      |      |                         | 0.8 | 0.5 | <b>1.69 (1.37-2.09)</b> | 1.1 | 0.8 | <b>1.31 (1.13-1.52)</b> | 2.1 | 1.5 | <b>1.38 (1.24-1.54)</b> | 3.8 | 2.8  | <b>1.35 (1.24-1.46)</b> |
| 1965                                | 0.4  | 0.3  | <b>1.34 (1.00-1.78)</b> | 0.6 | 0.5 | <b>1.33 (1.08-1.64)</b> | 1.2 | 0.9 | <b>1.38 (1.18-1.61)</b> | 2.2 | 1.5 | <b>1.46 (1.30-1.64)</b> |     |      |                         |
| 1970                                | 0.4  | 0.3  | <b>1.34 (1.01-1.77)</b> | 0.7 | 0.5 | <b>1.36 (1.11-1.67)</b> | 1.1 | 0.7 | <b>1.55 (1.31-1.84)</b> |     |     |                         |     |      |                         |
| 1975                                | 0.5  | 0.4  | <b>1.32 (1.02-1.72)</b> | 0.7 | 0.5 | <b>1.44 (1.16-1.80)</b> |     |     |                         |     |     |                         |     |      |                         |
| 1980                                | 0.5  | 0.4  | <b>1.48 (1.14-1.92)</b> |     |     |                         |     |     |                         |     |     |                         |     |      |                         |
| Youngest/oldest cohort IRR (95% CI) |      |      |                         |     |     |                         |     |     |                         |     |     |                         |     |      |                         |
| Male                                |      |      | 1.17 (0.87-1.58)        |     |     | 1.14 (0.90-1.45)        |     |     | <b>0.83 (0.69-0.99)</b> |     |     | 1.06 (0.92-1.21)        |     |      | 1.01 (0.91-1.11)        |
| Female                              |      |      | <b>1.30 (1.01-1.67)</b> |     |     | 0.97 (0.80-1.18)        |     |     | 1.16 (0.99-1.36)        |     |     | <b>1.31 (1.16-1.47)</b> |     |      | <b>1.18 (1.08-1.29)</b> |
| <b>UNSPECIFIED CARCINOMAS</b>       |      |      |                         |     |     |                         |     |     |                         |     |     |                         |     |      |                         |
| 1945                                |      |      |                         |     |     |                         |     |     |                         |     |     |                         | 6.9 | 10.3 | <b>0.67 (0.63-0.71)</b> |

|                                     |     |     |                         |     |     |                         |     |     |                         |     |     |                         |     |      |                         |
|-------------------------------------|-----|-----|-------------------------|-----|-----|-------------------------|-----|-----|-------------------------|-----|-----|-------------------------|-----|------|-------------------------|
| 1950                                |     |     |                         |     |     |                         |     |     |                         | 3.1 | 4.4 | <b>0.70 (0.64-0.76)</b> | 9.6 | 13.9 | <b>0.70 (0.66-0.73)</b> |
| 1955                                |     |     |                         |     |     |                         | 1.7 | 2.1 | <b>0.81 (0.72-0.91)</b> | 5.6 | 7.2 | <b>0.77 (0.73-0.82)</b> | 9.6 | 12.9 | <b>0.74 (0.71-0.78)</b> |
| 1960                                |     |     |                         | 0.6 | 0.6 | 0.87 (0.71-1.07)        | 2.9 | 3.1 | <b>0.91 (0.84-0.99)</b> | 5.8 | 6.4 | <b>0.90 (0.85-0.96)</b> | 5.2 | 6.3  | <b>0.83 (0.78-0.88)</b> |
| 1965                                | 0.2 | 0.2 | 0.89 (0.59-1.36)        | 0.9 | 1.0 | 0.95 (0.81-1.11)        | 2.5 | 2.4 | 1.03 (0.94-1.14)        | 2.7 | 2.9 | 0.93 (0.85-1.02)        |     |      |                         |
| 1970                                | 0.2 | 0.3 | 0.73 (0.50-1.04)        | 0.7 | 0.6 | 1.17 (0.96-1.42)        | 1.0 | 1.0 | 0.99 (0.84-1.17)        |     |     |                         |     |      |                         |
| 1975                                | 0.2 | 0.2 | 0.77 (0.50-1.18)        | 0.3 | 0.3 | 0.97 (0.70-1.35)        |     |     |                         |     |     |                         |     |      |                         |
| 1980                                | 0.1 | 0.1 | 0.82 (0.44-1.52)        |     |     |                         |     |     |                         |     |     |                         |     |      |                         |
| Youngest/oldest cohort IRR (95% CI) |     |     |                         |     |     |                         |     |     |                         |     |     |                         |     |      |                         |
| Male                                |     |     | <b>0.51 (0.31-0.83)</b> |     |     | <b>0.44 (0.33-0.57)</b> |     |     | <b>0.47 (0.41-0.54)</b> |     |     | <b>0.65 (0.60-0.71)</b> |     |      | <b>0.61 (0.58-0.65)</b> |
| Female                              |     |     | <b>0.47 (0.26-0.80)</b> |     |     | <b>0.49 (0.37-0.65)</b> |     |     | <b>0.58 (0.50-0.67)</b> |     |     | <b>0.87 (0.79-0.95)</b> |     |      | <b>0.76 (0.71-0.81)</b> |

White, black, and Asian/Pacific Islander race exclude persons of Hispanic ethnicity. Reference group is males for female-to-male IRRs. For birth cohort comparisons, the reference group is the oldest birth cohort by age (e.g., those born circa 1945 for 50-54 year-olds). IRRs were calculated using unrounded rates. Bold indicates the IRR is significantly different from 1.00 ( $p < 0.05$ ). Rates are per 100,000 person-years. The male rate for large cell carcinoma among 30-34 year-olds born circa 1980 and the corresponding rate ratio are suppressed due to sparse data (<6 cases).

**Table S4.** Age-specific current smoking prevalence and female-to-male prevalence ratios (PRs) by race/ethnicity and cohort year of birth

|              | 25-29 years                |                     |                     | 30-34 years                |                     |                     | 35-39 years                |                     |                     | 40-44 years                |                     |                     | 45-49 years                |                     |                     | 50-54 years                |                     |                     |
|--------------|----------------------------|---------------------|---------------------|----------------------------|---------------------|---------------------|----------------------------|---------------------|---------------------|----------------------------|---------------------|---------------------|----------------------------|---------------------|---------------------|----------------------------|---------------------|---------------------|
|              | Prevalence (%)<br>(95% CI) |                     | PR (95%<br>CI)      |
|              | F                          | M                   |                     | F                          | M                   |                     | F                          | M                   |                     | F                          | M                   |                     | F                          | M                   |                     | F                          | M                   |                     |
| <b>WHITE</b> |                            |                     |                     |                            |                     |                     |                            |                     |                     |                            |                     |                     |                            |                     |                     |                            |                     |                     |
| <b>1900</b>  | 20.4<br>(19.6-21.6)        | 68.2<br>(67.5-69.7) | 0.30<br>(0.29-0.32) | 20.7<br>(19.9-22.0)        | 66.2<br>(65.3-67.7) | 0.31<br>(0.30-0.33) | 20.8<br>(19.9-22.1)        | 63.6<br>(62.8-65.2) | 0.33<br>(0.32-0.35) | 20.6<br>(19.9-22.1)        | 60.5<br>(59.4-62.2) | 0.34<br>(0.33-0.37) | 20.3<br>(19.3-21.6)        | 57.1<br>(56.0-58.9) | 0.35<br>(0.34-0.38) | 19.7<br>(19.1-21.4)        | 53.4<br>(52.5-55.5) | 0.37<br>(0.35-0.40) |
| <b>1905</b>  | 28.4<br>(27.7-29.3)        | 72.5<br>(72.0-73.4) | 0.39<br>(0.38-0.41) | 28.7<br>(28.1-29.7)        | 70.2<br>(69.7-71.1) | 0.41<br>(0.40-0.42) | 28.7<br>(28.1-29.8)        | 67.2<br>(66.7-68.2) | 0.43<br>(0.42-0.44) | 28.4<br>(27.8-29.5)        | 63.8<br>(63.3-64.8) | 0.44<br>(0.44-0.46) | 27.8<br>(27.2-28.9)        | 60.1<br>(59.5-61.2) | 0.46<br>(0.45-0.48) | 26.9<br>(26.4-28.2)        | 56.0<br>(55.4-57.2) | 0.48<br>(0.47-0.50) |
| <b>1910</b>  | 35.6<br>(35.0-36.6)        | 74.1<br>(73.3-74.7) | 0.48<br>(0.47-0.49) | 35.8<br>(35.2-36.9)        | 71.5<br>(70.7-72.1) | 0.50<br>(0.49-0.52) | 35.6<br>(35.0-36.7)        | 68.2<br>(67.4-68.9) | 0.52<br>(0.51-0.54) | 35.0<br>(34.4-36.2)        | 64.5<br>(63.7-65.3) | 0.54<br>(0.53-0.56) | 34.1<br>(33.5-35.3)        | 60.4<br>(59.5-61.3) | 0.56<br>(0.55-0.59) | 32.9<br>(32.3-34.1)        | 56.0<br>(55.1-57.0) | 0.59<br>(0.57-0.61) |
| <b>1915</b>  | 39.4<br>(39.0-40.3)        | 73.2<br>(72.5-73.7) | 0.54<br>(0.53-0.55) | 39.4<br>(38.9-40.3)        | 70.3<br>(69.5-70.9) | 0.56<br>(0.55-0.57) | 38.9<br>(38.3-39.8)        | 66.7<br>(65.9-67.3) | 0.58<br>(0.57-0.60) | 38.1<br>(37.5-39.0)        | 62.7<br>(61.9-63.3) | 0.61<br>(0.60-0.62) | 36.8<br>(36.1-37.7)        | 58.3<br>(57.5-59.0) | 0.63<br>(0.62-0.65) | 35.2<br>(34.7-36.2)        | 53.6<br>(52.7-54.3) | 0.66<br>(0.64-0.68) |
| <b>1920</b>  | 41.7<br>(41.0-42.5)        | 72.5<br>(71.7-72.9) | 0.57<br>(0.57-0.59) | 41.4<br>(40.9-42.3)        | 69.1<br>(68.3-69.6) | 0.60<br>(0.59-0.62) | 40.6<br>(40.1-41.6)        | 65.1<br>(64.3-65.6) | 0.62<br>(0.61-0.64) | 39.5<br>(38.9-40.4)        | 60.6<br>(59.8-61.2) | 0.65<br>(0.64-0.67) | 37.9<br>(37.2-38.9)        | 55.7<br>(54.9-56.4) | 0.68<br>(0.67-0.70) | 36.0<br>(35.4-37.1)        | 50.7<br>(49.8-51.4) | 0.71<br>(0.70-0.74) |
| <b>1925</b>  | 44.4<br>(44.0-45.2)        | 72.0<br>(71.3-72.5) | 0.62<br>(0.61-0.63) | 43.9<br>(43.5-44.7)        | 68.1<br>(67.5-68.7) | 0.64<br>(0.64-0.66) | 42.9<br>(42.4-43.7)        | 63.6<br>(62.9-64.2) | 0.67<br>(0.67-0.69) | 41.5<br>(41.0-42.3)        | 58.6<br>(57.9-59.2) | 0.71<br>(0.70-0.73) | 39.6<br>(39.2-40.5)        | 53.3<br>(52.6-54.0) | 0.74<br>(0.73-0.76) | 37.4<br>(37.0-38.3)        | 47.8<br>(47.1-48.5) | 0.78<br>(0.77-0.81) |
| <b>1930</b>  | 46.6<br>(46.2-47.4)        | 69.2<br>(68.5-69.8) | 0.67<br>(0.67-0.69) | 45.9<br>(45.5-46.7)        | 65.1<br>(64.4-65.7) | 0.70<br>(0.70-0.72) | 44.6<br>(44.2-45.4)        | 60.4<br>(59.6-61.0) | 0.74<br>(0.73-0.76) | 43.0<br>(42.5-43.8)        | 55.2<br>(54.4-55.8) | 0.78<br>(0.77-0.80) | 40.9<br>(40.4-41.7)        | 49.7<br>(48.9-50.4) | 0.82<br>(0.81-0.85) | 38.4<br>(37.9-39.2)        | 44.1<br>(43.3-44.9) | 0.87<br>(0.85-0.90) |
| <b>1935</b>  | 49.3<br>(48.8-49.9)        | 66.4<br>(65.7-67.0) | 0.74<br>(0.73-0.76) | 48.2<br>(47.7-48.8)        | 62.3<br>(61.6-63.0) | 0.77<br>(0.76-0.79) | 46.6<br>(46.0-47.2)        | 57.6<br>(56.8-58.2) | 0.81<br>(0.80-0.82) | 44.5<br>(44.0-45.1)        | 52.4<br>(51.6-53.1) | 0.85<br>(0.84-0.87) | 42.0<br>(41.5-42.6)        | 47.0<br>(46.2-47.7) | 0.90<br>(0.88-0.92) | 39.1<br>(38.6-39.8)        | 41.4<br>(40.7-42.2) | 0.94<br>(0.92-0.97) |
| <b>1940</b>  | 49.6<br>(48.9-50.2)        | 64.6<br>(63.9-65.2) | 0.77<br>(0.75-0.78) | 48.1<br>(47.4-48.7)        | 60.4<br>(59.8-61.1) | 0.80<br>(0.78-0.81) | 46.0<br>(45.3-46.7)        | 55.6<br>(54.9-56.4) | 0.83<br>(0.81-0.84) | 43.6<br>(42.9-44.4)        | 50.4<br>(49.7-51.2) | 0.87<br>(0.84-0.88) | 40.8<br>(40.0-41.5)        | 45.0<br>(44.3-45.8) | 0.91<br>(0.88-0.93) | 37.5<br>(36.7-38.3)        | 39.6<br>(38.8-40.4) | 0.95<br>(0.92-0.98) |
| <b>1945</b>  | 47.1<br>(46.5-47.7)        | 60.9<br>(60.2-61.4) | 0.77<br>(0.76-0.79) | 45.3<br>(44.7-45.9)        | 56.8<br>(56.1-57.4) | 0.80<br>(0.78-0.81) | 43.0<br>(42.3-43.6)        | 52.1<br>(51.4-52.7) | 0.82<br>(0.81-0.84) | 40.3<br>(39.7-41.0)        | 47.0<br>(46.3-47.7) | 0.86<br>(0.84-0.88) | 37.3<br>(36.6-37.9)        | 41.8<br>(41.0-42.4) | 0.89<br>(0.87-0.92) | 33.9<br>(33.2-34.5)        | 36.5<br>(35.7-37.1) | 0.93<br>(0.90-0.96) |
| <b>1950</b>  | 41.5<br>(41.0-42.2)        | 55.1<br>(54.4-55.6) | 0.75<br>(0.74-0.77) | 39.7<br>(39.1-40.4)        | 51.4<br>(50.7-52.0) | 0.77<br>(0.76-0.79) | 37.4<br>(36.8-38.1)        | 47.1<br>(46.3-47.7) | 0.79<br>(0.78-0.81) | 34.9<br>(34.2-35.6)        | 42.5<br>(41.6-43.1) | 0.82<br>(0.80-0.84) | 31.9<br>(31.3-32.7)        | 37.6<br>(36.8-38.3) | 0.85<br>(0.83-0.88) | 28.7<br>(28.0-29.4)        | 32.8<br>(31.9-33.4) | 0.87<br>(0.85-0.91) |
| <b>1955</b>  | 41.5<br>(41.0-42.0)        | 51.1<br>(50.7-51.7) | 0.81<br>(0.80-0.82) | 39.5<br>(39.0-40.0)        | 47.9<br>(47.4-48.5) | 0.82<br>(0.81-0.84) | 37.0<br>(36.5-37.7)        | 44.0<br>(43.5-44.7) | 0.84<br>(0.82-0.86) | 34.3<br>(33.8-35.0)        | 39.8<br>(39.3-40.5) | 0.86<br>(0.84-0.88) | 31.3<br>(30.7-31.9)        | 35.4<br>(34.9-36.1) | 0.88<br>(0.86-0.90) | 27.9<br>(27.4-28.5)        | 31.0<br>(30.5-31.7) | 0.90<br>(0.87-0.93) |
| <b>1960</b>  | 41.7<br>(41.2-42.2)        | 45.2<br>(44.8-45.8) | 0.92<br>(0.90-0.93) | 39.5<br>(39.1-40.1)        | 42.3<br>(41.8-43.0) | 0.93<br>(0.91-0.95) | 37.0<br>(36.5-37.6)        | 38.9<br>(38.4-39.6) | 0.95<br>(0.93-0.96) | 34.1<br>(33.6-34.8)        | 35.2<br>(34.8-36.0) | 0.97<br>(0.94-0.99) | 31.0<br>(30.4-31.6)        | 31.3<br>(30.7-32.1) | 0.99<br>(0.96-1.01) | 27.5<br>(27.0-28.2)        | 27.3<br>(26.8-28.2) | 1.01<br>(0.97-1.03) |
| <b>1965</b>  | 40.1<br>(39.7-40.7)        | 41.4<br>(41.0-42.1) | 0.97<br>(0.95-0.98) | 37.8<br>(37.4-38.6)        | 38.4<br>(38.1-39.1) | 0.99<br>(0.97-1.00) | 35.2<br>(34.7-36.0)        | 34.9<br>(34.5-35.6) | 1.01<br>(0.99-1.03) | 32.3<br>(31.8-33.1)        | 31.1<br>(30.7-31.8) | 1.04<br>(1.01-1.07) | 29.1<br>(28.6-30.0)        | 27.2<br>(26.8-27.9) | 1.07<br>(1.04-1.10) |                            |                     |                     |

|              |                     |                     |                     |                     |                     |                     |                     |                     |                     |                     |                     |                     |                     |                     |                     |                     |                     |                     |
|--------------|---------------------|---------------------|---------------------|---------------------|---------------------|---------------------|---------------------|---------------------|---------------------|---------------------|---------------------|---------------------|---------------------|---------------------|---------------------|---------------------|---------------------|---------------------|
| <b>1970</b>  | 37.7<br>(37.1-38.8) | 40.0<br>(39.6-40.8) | 0.94<br>(0.92-0.97) | 35.3<br>(34.6-36.6) | 36.4<br>(35.9-37.3) | 0.97<br>(0.95-1.01) | 32.6<br>(31.5-34.0) | 32.4<br>(31.9-33.3) | 1.00<br>(0.98-1.06) | 29.6<br>(28.8-31.5) | 28.2<br>(27.6-29.2) | 1.05<br>(1.02-1.12) |                     |                     |                     |                     |                     |                     |
| <b>1975</b>  | 35.5<br>(34.8-37.1) | 38.4<br>(37.8-39.3) | 0.92<br>(0.90-0.97) | 32.9<br>(31.8-34.9) | 34.4<br>(33.6-35.4) | 0.96<br>(0.93-1.02) | 30.1<br>(28.7-32.3) | 30.0<br>(29.2-31.1) | 1.00<br>(0.96-1.09) |                     |                     |                     |                     |                     |                     |                     |                     |                     |
| <b>1980</b>  | 33.5<br>(32.2-35.9) | 36.4<br>(35.6-37.6) | 0.92<br>(0.89-0.99) | 30.8<br>(29.2-34.0) | 32.1<br>(31.3-33.8) | 0.96<br>(0.90-1.05) |                     |                     |                     |                     |                     |                     |                     |                     |                     |                     |                     |                     |
| <b>1985</b>  | 31.6<br>(29.6-34.8) | 34.4<br>(33.4-36.4) | 0.92<br>(0.88-1.02) |                     |                     |                     |                     |                     |                     |                     |                     |                     |                     |                     |                     |                     |                     |                     |
| <b>BLACK</b> |                     |                     |                     |                     |                     |                     |                     |                     |                     |                     |                     |                     |                     |                     |                     |                     |                     |                     |
| <b>1900</b>  | 17.8<br>(14.9-21.2) | 64.2<br>(59.7-68.5) | 0.28<br>(0.23-0.33) | 18.8<br>(15.7-22.3) | 64.9<br>(60.4-69.4) | 0.29<br>(0.24-0.35) | 19.3<br>(15.9-23.0) | 64.7<br>(60.3-69.5) | 0.30<br>(0.24-0.36) | 19.6<br>(16.0-23.3) | 64.0<br>(59.7-69.3) | 0.31<br>(0.25-0.37) | 19.7<br>(16.1-23.4) | 62.9<br>(58.5-68.8) | 0.31<br>(0.25-0.37) | 19.7<br>(15.9-23.5) | 61.6<br>(57.4-68.2) | 0.32<br>(0.25-0.38) |
| <b>1905</b>  | 21.0<br>(18.8-23.6) | 68.8<br>(66.0-71.5) | 0.30<br>(0.27-0.35) | 22.0<br>(19.7-24.9) | 69.1<br>(66.4-72.0) | 0.32<br>(0.28-0.36) | 22.5<br>(20.2-25.4) | 68.4<br>(66.0-71.6) | 0.33<br>(0.29-0.37) | 22.6<br>(20.3-25.6) | 67.1<br>(64.8-70.8) | 0.34<br>(0.30-0.38) | 22.5<br>(20.0-25.6) | 65.3<br>(63.2-69.7) | 0.34<br>(0.30-0.39) | 22.3<br>(19.6-25.6) | 63.5<br>(60.5-68.2) | 0.35<br>(0.30-0.40) |
| <b>1910</b>  | 25.0<br>(22.8-27.8) | 71.1<br>(68.7-73.5) | 0.35<br>(0.32-0.39) | 26.0<br>(23.8-29.1) | 70.9<br>(68.7-73.7) | 0.37<br>(0.33-0.41) | 26.2<br>(23.9-29.4) | 69.7<br>(67.5-72.9) | 0.38<br>(0.34-0.42) | 26.0<br>(23.7-29.5) | 67.8<br>(65.7-71.7) | 0.38<br>(0.34-0.43) | 25.4<br>(23.1-29.3) | 65.4<br>(62.8-69.9) | 0.39<br>(0.34-0.44) | 24.8<br>(22.4-28.8) | 63.0<br>(59.5-67.8) | 0.39<br>(0.34-0.45) |
| <b>1915</b>  | 30.4<br>(29.0-33.1) | 72.6<br>(70.7-74.7) | 0.42<br>(0.40-0.46) | 31.3<br>(30.0-34.2) | 72.0<br>(70.2-74.5) | 0.43<br>(0.41-0.48) | 31.3<br>(29.5-34.2) | 70.3<br>(68.5-73.3) | 0.44<br>(0.42-0.49) | 30.7<br>(28.5-33.7) | 67.9<br>(66.2-71.7) | 0.45<br>(0.42-0.50) | 29.7<br>(27.9-33.2) | 65.1<br>(62.1-69.1) | 0.46<br>(0.42-0.51) | 28.4<br>(26.0-32.1) | 62.1<br>(58.9-66.8) | 0.46<br>(0.41-0.52) |
| <b>1920</b>  | 36.6<br>(35.1-39.7) | 73.7<br>(72.0-75.7) | 0.50<br>(0.47-0.54) | 37.5<br>(35.5-40.4) | 72.8<br>(71.3-75.1) | 0.51<br>(0.48-0.56) | 37.2<br>(35.4-40.5) | 70.7<br>(69.3-73.4) | 0.53<br>(0.49-0.57) | 36.2<br>(34.9-39.8) | 67.8<br>(65.7-71.0) | 0.53<br>(0.51-0.59) | 34.8<br>(32.8-38.0) | 64.5<br>(62.7-68.6) | 0.54<br>(0.51-0.60) | 33.2<br>(31.6-36.9) | 61.1<br>(59.2-65.7) | 0.54<br>(0.51-0.61) |
| <b>1925</b>  | 41.1<br>(39.3-43.6) | 73.7<br>(72.2-75.7) | 0.56<br>(0.54-0.60) | 41.8<br>(40.4-44.7) | 72.3<br>(70.9-74.6) | 0.58<br>(0.56-0.62) | 41.2<br>(39.9-44.3) | 69.7<br>(68.4-72.4) | 0.59<br>(0.56-0.63) | 40.0<br>(38.8-43.2) | 66.3<br>(64.9-69.3) | 0.60<br>(0.58-0.65) | 38.2<br>(36.9-41.5) | 62.5<br>(60.6-66.0) | 0.61<br>(0.59-0.66) | 36.1<br>(34.5-39.4) | 58.6<br>(56.8-62.8) | 0.62<br>(0.59-0.67) |
| <b>1930</b>  | 43.3<br>(42.3-45.8) | 71.4<br>(69.9-73.6) | 0.61<br>(0.59-0.64) | 43.8<br>(42.8-46.4) | 69.8<br>(68.2-72.1) | 0.63<br>(0.61-0.67) | 43.0<br>(41.8-45.7) | 66.8<br>(65.2-69.5) | 0.64<br>(0.63-0.69) | 41.5<br>(39.7-43.9) | 63.0<br>(61.6-66.3) | 0.66<br>(0.63-0.71) | 39.3<br>(37.9-42.1) | 58.9<br>(56.4-62.3) | 0.67<br>(0.64-0.72) | 36.9<br>(35.4-39.9) | 54.6<br>(52.1-58.6) | 0.68<br>(0.64-0.74) |
| <b>1935</b>  | 46.3<br>(45.3-48.9) | 68.4<br>(66.7-70.3) | 0.68<br>(0.66-0.72) | 46.7<br>(45.4-49.2) | 66.7<br>(65.0-68.8) | 0.70<br>(0.68-0.74) | 45.6<br>(44.6-48.4) | 63.6<br>(61.9-66.0) | 0.72<br>(0.69-0.77) | 43.8<br>(42.6-46.7) | 59.8<br>(57.9-62.5) | 0.73<br>(0.70-0.79) | 41.3<br>(40.2-44.5) | 55.6<br>(53.7-58.7) | 0.74<br>(0.72-0.81) | 38.6<br>(36.9-41.6) | 51.2<br>(49.5-54.9) | 0.75<br>(0.72-0.83) |
| <b>1940</b>  | 47.4<br>(46.4-49.7) | 67.5<br>(65.8-69.3) | 0.70<br>(0.68-0.74) | 47.7<br>(46.6-50.1) | 65.8<br>(64.2-67.8) | 0.73<br>(0.70-0.77) | 46.5<br>(45.2-49.0) | 62.6<br>(61.0-64.9) | 0.74<br>(0.71-0.79) | 44.5<br>(43.0-47.1) | 58.7<br>(57.0-61.1) | 0.76<br>(0.73-0.81) | 42.0<br>(40.1-44.7) | 54.5<br>(52.7-57.3) | 0.77<br>(0.73-0.83) | 39.0<br>(37.5-42.5) | 50.1<br>(48.4-53.3) | 0.78<br>(0.73-0.85) |
| <b>1945</b>  | 48.2<br>(47.4-49.7) | 65.8<br>(64.4-67.7) | 0.73<br>(0.71-0.76) | 48.3<br>(47.3-49.9) | 64.1<br>(62.7-66.2) | 0.75<br>(0.73-0.79) | 47.1<br>(46.0-48.8) | 61.0<br>(59.7-63.4) | 0.77<br>(0.74-0.81) | 45.0<br>(43.8-46.9) | 57.0<br>(55.7-59.7) | 0.79<br>(0.76-0.83) | 42.3<br>(41.1-44.5) | 52.8<br>(51.4-56.0) | 0.80<br>(0.76-0.85) | 39.3<br>(38.1-42.0) | 48.4<br>(46.9-52.0) | 0.81<br>(0.76-0.87) |
| <b>1950</b>  | 45.4<br>(44.1-46.8) | 60.1<br>(58.8-62.3) | 0.75<br>(0.72-0.78) | 45.6<br>(44.3-47.2) | 58.6<br>(57.3-61.1) | 0.78<br>(0.74-0.81) | 44.4<br>(43.1-46.3) | 55.8<br>(54.5-58.5) | 0.80<br>(0.75-0.83) | 42.4<br>(41.1-44.6) | 52.2<br>(50.2-55.0) | 0.81<br>(0.76-0.86) | 39.9<br>(38.4-42.4) | 48.2<br>(46.7-51.8) | 0.83<br>(0.76-0.88) | 36.9<br>(35.5-39.9) | 44.2<br>(42.0-48.0) | 0.84<br>(0.75-0.90) |
| <b>1955</b>  | 45.3<br>(44.0-46.7) | 55.4<br>(54.3-57.5) | 0.82<br>(0.78-0.85) | 45.4<br>(44.2-47.1) | 54.1<br>(52.9-56.6) | 0.84<br>(0.80-0.88) | 44.2<br>(43.0-46.1) | 51.6<br>(49.5-54.2) | 0.86<br>(0.80-0.90) | 42.2<br>(40.9-44.3) | 48.3<br>(46.3-51.4) | 0.87<br>(0.81-0.92) | 39.6<br>(38.2-42.0) | 44.6<br>(42.0-48.2) | 0.89<br>(0.81-0.94) | 36.6<br>(35.3-39.4) | 40.9<br>(38.0-45.1) | 0.89<br>(0.80-0.96) |
| <b>1960</b>  | 41.3<br>(40.3-42.7) | 46.4<br>(45.3-48.5) | 0.89<br>(0.84-0.93) | 41.4<br>(40.4-43.0) | 45.4<br>(44.3-47.9) | 0.91<br>(0.86-0.95) | 40.2<br>(39.2-42.0) | 43.3<br>(41.3-45.9) | 0.93<br>(0.86-0.97) | 38.2<br>(37.1-40.3) | 40.5<br>(38.3-43.7) | 0.94<br>(0.86-1.00) | 35.7<br>(34.5-38.1) | 37.4<br>(35.4-41.4) | 0.95<br>(0.85-1.02) | 32.8<br>(31.5-35.7) | 34.3<br>(31.4-38.5) | 0.96<br>(0.83-1.03) |

|                 |                     |                     |                     |                     |                     |                     |                     |                     |                     |                     |                     |                     |                     |                     |                     |                     |                     |                     |
|-----------------|---------------------|---------------------|---------------------|---------------------|---------------------|---------------------|---------------------|---------------------|---------------------|---------------------|---------------------|---------------------|---------------------|---------------------|---------------------|---------------------|---------------------|---------------------|
| <b>1965</b>     | 32.2<br>(31.4-33.4) | 37.5<br>(36.6-39.4) | 0.86<br>(0.81-0.90) | 32.2<br>(31.4-33.7) | 36.7<br>(35.6-38.9) | 0.88<br>(0.82-0.92) | 31.1<br>(30.0-32.9) | 34.9<br>(33.5-37.4) | 0.89<br>(0.82-0.95) | 29.3<br>(28.1-31.5) | 32.5<br>(30.7-35.5) | 0.90<br>(0.81-0.97) | 27.1<br>(25.5-29.5) | 29.9<br>(28.1-33.6) | 0.91<br>(0.80-0.98) |                     |                     |                     |
| <b>1970</b>     | 24.5<br>(23.9-25.9) | 32.6<br>(31.5-34.3) | 0.75<br>(0.70-0.79) | 24.5<br>(23.4-26.1) | 32.0<br>(31.0-34.5) | 0.77<br>(0.71-0.82) | 23.6<br>(22.3-25.6) | 30.4<br>(29.1-33.6) | 0.78<br>(0.70-0.84) | 22.2<br>(20.9-24.7) | 28.3<br>(26.9-32.3) | 0.78<br>(0.69-0.87) |                     |                     |                     |                     |                     |                     |
| <b>1975</b>     | 22.0<br>(21.1-23.2) | 31.5<br>(30.5-33.3) | 0.70<br>(0.66-0.74) | 22.1<br>(21.5-23.9) | 31.1<br>(29.7-33.2) | 0.71<br>(0.66-0.76) | 21.5<br>(20.5-23.6) | 29.8<br>(28.6-32.9) | 0.72<br>(0.66-0.78) |                     |                     |                     |                     |                     |                     |                     |                     |                     |
| <b>1980</b>     | 22.6<br>(21.9-23.7) | 32.2<br>(31.1-34.0) | 0.70<br>(0.66-0.74) | 23.0<br>(22.1-24.4) | 32.1<br>(31.1-34.7) | 0.72<br>(0.67-0.76) |                     |                     |                     |                     |                     |                     |                     |                     |                     |                     |                     |                     |
| <b>1985</b>     | 23.9<br>(23.1-25.2) | 33.3<br>(32.1-35.5) | 0.72<br>(0.68-0.77) |                     |                     |                     |                     |                     |                     |                     |                     |                     |                     |                     |                     |                     |                     |                     |
| <b>HISPANIC</b> |                     |                     |                     |                     |                     |                     |                     |                     |                     |                     |                     |                     |                     |                     |                     |                     |                     |                     |
| <b>1900</b>     | 22.6<br>(14.1-38.5) | 64.3<br>(52.3-73.8) | 0.35<br>(0.20-0.63) | 23.8<br>(13.9-40.2) | 64.4<br>(51.2-74.4) | 0.37<br>(0.20-0.67) | 24.7<br>(13.3-41.4) | 63.9<br>(48.9-74.8) | 0.39<br>(0.18-0.69) | 25.3<br>(11.7-42.3) | 63.2<br>(46.2-75.0) | 0.40<br>(0.16-0.71) | 25.6<br>(10.2-42.8) | 62.0<br>(43.2-75.0) | 0.41<br>(0.14-0.76) | 25.9<br>(9.2-43.0)  | 60.7<br>(39.0-75.1) | 0.43<br>(0.12-0.79) |
| <b>1905</b>     | 24.1<br>(18.4-32.2) | 64.0<br>(54.3-70.6) | 0.38<br>(0.28-0.53) | 25.3<br>(19.1-33.8) | 64.2<br>(54.9-71.2) | 0.39<br>(0.29-0.55) | 26.1<br>(19.4-34.9) | 63.9<br>(54.6-71.5) | 0.41<br>(0.29-0.57) | 26.6<br>(19.1-35.5) | 63.3<br>(54.3-71.8) | 0.42<br>(0.28-0.58) | 26.9<br>(18.2-35.9) | 62.3<br>(53.6-71.8) | 0.43<br>(0.27-0.59) | 27.0<br>(17.5-36.1) | 61.2<br>(52.7-71.6) | 0.44<br>(0.27-0.60) |
| <b>1910</b>     | 25.2<br>(19.9-29.3) | 62.8<br>(53.4-68.4) | 0.40<br>(0.32-0.51) | 26.3<br>(20.8-30.7) | 63.0<br>(53.8-68.7) | 0.42<br>(0.33-0.53) | 26.9<br>(21.3-31.5) | 62.5<br>(53.6-68.8) | 0.43<br>(0.35-0.55) | 27.1<br>(21.5-31.9) | 61.8<br>(52.7-68.7) | 0.44<br>(0.34-0.56) | 27.1<br>(21.1-32.2) | 60.7<br>(51.7-68.3) | 0.45<br>(0.34-0.57) | 26.9<br>(20.9-32.3) | 59.4<br>(50.4-68.0) | 0.45<br>(0.34-0.58) |
| <b>1915</b>     | 26.0<br>(22.1-28.8) | 61.0<br>(56.7-66.6) | 0.43<br>(0.35-0.48) | 26.8<br>(23.0-30.0) | 60.5<br>(56.2-66.7) | 0.44<br>(0.37-0.50) | 27.1<br>(23.4-30.7) | 59.4<br>(54.9-66.4) | 0.46<br>(0.38-0.52) | 26.9<br>(23.5-31.0) | 58.0<br>(53.1-66.2) | 0.46<br>(0.38-0.54) | 26.4<br>(23.2-31.1) | 56.1<br>(50.8-65.7) | 0.47<br>(0.39-0.56) | 25.8<br>(22.9-31.0) | 54.0<br>(48.2-65.3) | 0.48<br>(0.39-0.59) |
| <b>1920</b>     | 26.6<br>(24.2-29.4) | 61.2<br>(57.8-66.2) | 0.44<br>(0.38-0.47) | 27.2<br>(24.9-30.4) | 59.7<br>(57.1-65.9) | 0.46<br>(0.39-0.49) | 27.2<br>(25.0-30.8) | 57.4<br>(53.8-63.9) | 0.47<br>(0.41-0.52) | 26.8<br>(24.8-30.7) | 54.8<br>(51.3-62.5) | 0.49<br>(0.42-0.54) | 26.0<br>(23.6-30.3) | 51.7<br>(47.7-60.4) | 0.50<br>(0.42-0.56) | 25.0<br>(22.8-29.9) | 48.3<br>(42.8-57.3) | 0.52<br>(0.43-0.59) |
| <b>1925</b>     | 26.4<br>(24.8-29.3) | 63.1<br>(61.2-66.8) | 0.42<br>(0.39-0.46) | 26.7<br>(24.7-29.7) | 60.8<br>(58.9-65.3) | 0.44<br>(0.41-0.49) | 26.5<br>(24.3-29.8) | 57.9<br>(55.6-63.2) | 0.46<br>(0.42-0.51) | 25.8<br>(23.9-29.9) | 54.4<br>(51.0-60.1) | 0.47<br>(0.43-0.54) | 24.7<br>(22.7-29.3) | 50.6<br>(47.9-58.1) | 0.49<br>(0.44-0.56) | 23.5<br>(20.9-28.1) | 46.5<br>(43.4-55.2) | 0.51<br>(0.45-0.59) |
| <b>1930</b>     | 25.8<br>(24.5-28.6) | 61.4<br>(59.5-64.3) | 0.42<br>(0.40-0.47) | 26.0<br>(24.5-29.2) | 59.2<br>(57.4-62.5) | 0.44<br>(0.40-0.49) | 25.6<br>(24.3-29.5) | 56.2<br>(53.4-59.9) | 0.45<br>(0.42-0.51) | 24.7<br>(22.5-28.3) | 52.7<br>(49.6-57.1) | 0.47<br>(0.43-0.55) | 23.4<br>(21.7-28.2) | 48.9<br>(45.8-54.2) | 0.48<br>(0.43-0.57) | 22.0<br>(20.2-27.5) | 44.8<br>(42.3-51.5) | 0.49<br>(0.42-0.59) |
| <b>1935</b>     | 28.2<br>(26.7-30.8) | 61.5<br>(59.6-64.1) | 0.46<br>(0.44-0.50) | 28.2<br>(26.8-31.2) | 59.0<br>(57.3-62.2) | 0.48<br>(0.45-0.53) | 27.6<br>(26.0-30.9) | 55.8<br>(54.2-59.5) | 0.49<br>(0.46-0.55) | 26.5<br>(24.8-30.3) | 52.2<br>(50.3-56.4) | 0.51<br>(0.46-0.58) | 25.0<br>(22.6-28.7) | 48.1<br>(45.3-52.7) | 0.52<br>(0.47-0.60) | 23.4<br>(21.0-27.9) | 43.8<br>(40.1-48.7) | 0.53<br>(0.47-0.63) |
| <b>1940</b>     | 30.3<br>(29.2-32.7) | 58.9<br>(57.1-61.7) | 0.51<br>(0.49-0.56) | 30.3<br>(28.9-32.9) | 56.3<br>(54.5-59.5) | 0.54<br>(0.51-0.59) | 29.6<br>(28.1-32.5) | 52.9<br>(51.2-56.7) | 0.56<br>(0.53-0.62) | 28.4<br>(26.7-31.7) | 49.1<br>(46.3-52.9) | 0.58<br>(0.54-0.65) | 26.8<br>(24.8-30.3) | 44.9<br>(42.1-49.6) | 0.60<br>(0.55-0.69) | 25.0<br>(22.9-29.1) | 40.5<br>(37.9-46.3) | 0.62<br>(0.57-0.73) |
| <b>1945</b>     | 31.1<br>(29.7-33.0) | 56.1<br>(54.2-58.7) | 0.55<br>(0.53-0.60) | 31.1<br>(29.9-33.4) | 53.4<br>(51.5-56.2) | 0.58<br>(0.55-0.63) | 30.3<br>(28.8-32.8) | 49.9<br>(48.1-53.0) | 0.61<br>(0.57-0.67) | 29.1<br>(27.8-32.0) | 46.1<br>(44.3-49.6) | 0.63<br>(0.59-0.71) | 27.4<br>(25.7-30.5) | 41.8<br>(40.0-45.9) | 0.66<br>(0.61-0.75) | 25.6<br>(23.7-29.2) | 37.5<br>(34.5-41.7) | 0.68<br>(0.63-0.80) |
| <b>1950</b>     | 29.4<br>(28.4-31.2) | 51.0<br>(49.3-53.1) | 0.58<br>(0.55-0.62) | 29.3<br>(28.0-31.3) | 48.4<br>(46.6-50.7) | 0.61<br>(0.58-0.66) | 28.5<br>(27.3-31.0) | 45.1<br>(43.3-47.6) | 0.63<br>(0.59-0.69) | 27.3<br>(25.8-29.9) | 41.4<br>(39.5-44.2) | 0.66<br>(0.60-0.73) | 25.6<br>(24.0-28.6) | 37.4<br>(35.5-40.7) | 0.68<br>(0.63-0.78) | 23.7<br>(21.9-27.2) | 33.3<br>(31.5-37.0) | 0.71<br>(0.64-0.84) |
| <b>1955</b>     | 31.5<br>(30.7-33.2) | 45.7<br>(44.3-47.7) | 0.69<br>(0.66-0.73) | 31.2<br>(29.9-33.0) | 43.2<br>(41.7-45.3) | 0.72<br>(0.69-0.78) | 30.0<br>(29.0-32.3) | 39.9<br>(38.4-42.3) | 0.75<br>(0.71-0.82) | 28.4<br>(27.1-30.9) | 36.3<br>(34.7-38.9) | 0.78<br>(0.73-0.87) | 26.4<br>(24.5-29.0) | 32.5<br>(31.0-35.4) | 0.81<br>(0.75-0.91) | 24.2<br>(22.2-27.5) | 28.6<br>(26.6-31.8) | 0.84<br>(0.78-0.98) |

|             |                     |                     |                     |                     |                     |                     |                     |                     |                     |                     |                     |                     |                     |                     |                     |                     |                     |                     |
|-------------|---------------------|---------------------|---------------------|---------------------|---------------------|---------------------|---------------------|---------------------|---------------------|---------------------|---------------------|---------------------|---------------------|---------------------|---------------------|---------------------|---------------------|---------------------|
| <b>1960</b> | 28.8<br>(27.8-30.5) | 40.5<br>(39.3-42.6) | 0.71<br>(0.67-0.76) | 28.3<br>(27.3-30.3) | 37.9<br>(36.7-40.4) | 0.75<br>(0.70-0.80) | 27.1<br>(26.0-29.4) | 34.8<br>(33.5-37.5) | 0.78<br>(0.72-0.85) | 25.4<br>(24.2-28.1) | 31.3<br>(29.6-34.2) | 0.81<br>(0.74-0.90) | 23.3<br>(21.6-26.3) | 27.7<br>(25.6-30.7) | 0.84<br>(0.75-0.95) | 21.1<br>(19.0-24.4) | 24.1<br>(22.2-27.7) | 0.88<br>(0.77-1.02) |
| <b>1965</b> | 23.1<br>(22.2-24.6) | 35.3<br>(34.2-37.2) | 0.66<br>(0.62-0.71) | 22.8<br>(21.9-24.7) | 32.8<br>(31.8-35.1) | 0.69<br>(0.65-0.76) | 21.8<br>(20.4-23.9) | 29.9<br>(28.4-32.5) | 0.73<br>(0.68-0.82) | 20.4<br>(19.3-23.3) | 26.6<br>(25.0-29.5) | 0.77<br>(0.71-0.88) | 18.8<br>(17.3-22.0) | 23.3<br>(21.6-26.6) | 0.81<br>(0.74-0.96) |                     |                     |                     |
| <b>1970</b> | 18.5<br>(17.8-20.0) | 31.2<br>(30.3-33.1) | 0.59<br>(0.57-0.65) | 18.2<br>(17.2-20.0) | 28.9<br>(27.6-31.3) | 0.63<br>(0.59-0.70) | 17.5<br>(16.4-19.9) | 26.2<br>(24.8-29.1) | 0.67<br>(0.62-0.78) | 16.4<br>(15.1-19.4) | 23.2<br>(21.6-26.4) | 0.71<br>(0.64-0.85) |                     |                     |                     |                     |                     |                     |
| <b>1975</b> | 16.1<br>(15.6-17.7) | 28.8<br>(28.0-30.8) | 0.56<br>(0.52-0.60) | 15.8<br>(14.9-17.8) | 26.7<br>(25.4-29.1) | 0.59<br>(0.56-0.67) | 15.1<br>(14.1-17.8) | 24.2<br>(22.7-27.2) | 0.62<br>(0.56-0.71) |                     |                     |                     |                     |                     |                     |                     |                     |                     |
| <b>1980</b> | 15.6<br>(14.8-17.3) | 27.5<br>(26.5-30.1) | 0.57<br>(0.54-0.62) | 15.1<br>(14.4-17.8) | 25.6<br>(24.0-28.7) | 0.59<br>(0.55-0.67) |                     |                     |                     |                     |                     |                     |                     |                     |                     |                     |                     |                     |
| <b>1985</b> | 15.3<br>(14.1-17.5) | 26.8<br>(25.1-29.8) | 0.57<br>(0.53-0.64) |                     |                     |                     |                     |                     |                     |                     |                     |                     |                     |                     |                     |                     |                     |                     |

Abbreviations: F, female; CI, confidence interval; M, male. Reference group for PRs is males. White and black race exclude persons of Hispanic ethnicity.

**Table S5.** Age-specific lung cancer incidence rates, rate ratios (IRRs), and stage distribution among whites, by sex, stage, and calendar period

|                    | Localized |      |                             |                  |      | Regional |      |                             |                  |      | Distant |      |                             |                  |      | Unknown |      |                             |                  |      |
|--------------------|-----------|------|-----------------------------|------------------|------|----------|------|-----------------------------|------------------|------|---------|------|-----------------------------|------------------|------|---------|------|-----------------------------|------------------|------|
|                    | Rate      |      | Female-to-male IRR (95% CI) | Percent of cases |      | Rate     |      | Female-to-male IRR (95% CI) | Percent of cases |      | Rate    |      | Female-to-male IRR (95% CI) | Percent of cases |      | Rate    |      | Female-to-male IRR (95% CI) | Percent of cases |      |
|                    | Female    | Male |                             | Female           | Male | Female   | Male |                             | Female           | Male | Female  | Male |                             | Female           | Male | Female  | Male |                             | Female           | Male |
| <b>30-34 years</b> |           |      |                             |                  |      |          |      |                             |                  |      |         |      |                             |                  |      |         |      |                             |                  |      |
| 2001-04            | 0.4       | 0.2  | <b>1.83</b><br>(1.31-2.59)  | 31%              | 16%  | 0.4      | 0.3  | 1.18<br>(0.86-1.63)         | 27%              | 21%  | 0.6     | 0.7  | <b>0.79</b><br>(0.63-1.00)  | 42%              | 50%  | 0.1     | 0.2  | <b>0.55</b><br>(0.33-0.92)  | 8%               | 13%  |
| 2005-09            | 0.5       | 0.3  | <b>1.56</b><br>(1.19-2.06)  | 34%              | 23%  | 0.3      | 0.3  | 1.14<br>(0.82-1.59)         | 20%              | 19%  | 0.7     | 0.7  | 0.92<br>(0.75-1.13)         | 45%              | 52%  | 0.1     | 0.1  | 0.85<br>(0.44-1.60)         | 5%               | 6%   |
| 2010-14            | 0.4       | 0.3  | <b>1.71</b><br>(1.26-2.32)  | 32%              | 23%  | 0.3      | 0.3  | 1.15<br>(0.83-1.59)         | 22%              | 24%  | 0.6     | 0.5  | 1.12<br>(0.90-1.40)         | 46%              | 50%  | <0.1    | <0.1 | 1.42<br>(0.59-3.58)         | 4%               | 3%   |
| <b>35-39 years</b> |           |      |                             |                  |      |          |      |                             |                  |      |         |      |                             |                  |      |         |      |                             |                  |      |
| 2001-04            | 0.9       | 0.6  | <b>1.57</b><br>(1.27-1.94)  | 17%              | 12%  | 1.2      | 1.1  | 1.13<br>(0.96-1.33)         | 24%              | 23%  | 2.9     | 2.6  | 1.10<br>(0.99-1.22)         | 58%              | 56%  | 0.3     | 0.4  | 0.77<br>(0.57-1.04)         | 6%               | 9%   |
| 2005-09            | 0.9       | 0.5  | <b>1.69</b><br>(1.39-2.08)  | 21%              | 14%  | 0.9      | 0.8  | 1.13<br>(0.95-1.36)         | 22%              | 21%  | 2.3     | 2.2  | 1.06<br>(0.96-1.18)         | 57%              | 59%  | 0.2     | 0.3  | 0.91<br>(0.65-1.27)         | 6%               | 7%   |
| 2010-14            | 0.8       | 0.5  | <b>1.60</b><br>(1.28-2.01)  | 23%              | 16%  | 0.8      | 0.6  | <b>1.23</b><br>(1.00-1.51)  | 23%              | 21%  | 1.8     | 1.8  | 1.02<br>(0.89-1.15)         | 53%              | 58%  | 0.1     | 0.1  | 1.07<br>(0.67-1.71)         | 4%               | 5%   |
| <b>40-44 years</b> |           |      |                             |                  |      |          |      |                             |                  |      |         |      |                             |                  |      |         |      |                             |                  |      |
| 2001-04            | 2.4       | 1.6  | <b>1.49</b><br>(1.33-1.68)  | 17%              | 11%  | 3.9      | 3.6  | 1.08<br>(1.00-1.18)         | 27%              | 24%  | 8.2     | 8.6  | 0.95<br>(0.90-1.00)         | 56%              | 57%  | 1.0     | 1.2  | <b>0.82</b><br>(0.70-0.96)  | 7%               | 8%   |
| 2005-09            | 2.3       | 1.3  | <b>1.82</b><br>(1.61-2.05)  | 17%              | 10%  | 3.1      | 2.7  | <b>1.12</b><br>(1.03-1.23)  | 24%              | 23%  | 7.7     | 7.4  | 1.03<br>(0.98-1.09)         | 59%              | 61%  | 0.6     | 0.7  | 0.91<br>(0.75-1.10)         | 5%               | 6%   |
| 2010-14            | 1.8       | 1.0  | <b>1.82</b><br>(1.57-2.10)  | 18%              | 11%  | 2.3      | 1.9  | <b>1.19</b><br>(1.07-1.33)  | 23%              | 22%  | 6.0     | 5.6  | <b>1.07</b><br>(1.00-1.14)  | 59%              | 62%  | 0.4     | 0.5  | 0.91<br>(0.71-1.16)         | 4%               | 5%   |
| <b>45-49 years</b> |           |      |                             |                  |      |          |      |                             |                  |      |         |      |                             |                  |      |         |      |                             |                  |      |
| 2001-04            | 5.1       | 3.7  | <b>1.37</b><br>(1.27-1.49)  | 18%              | 11%  | 7.4      | 8.7  | <b>0.85</b><br>(0.80-0.90)  | 26%              | 25%  | 15.7    | 19.6 | <b>0.80</b><br>(0.77-0.84)  | 56%              | 56%  | 2.2     | 2.9  | <b>0.76</b><br>(0.68-0.84)  | 8%               | 8%   |
| 2005-09            | 5.6       | 3.3  | <b>1.68</b><br>(1.56-1.80)  | 17%              | 10%  | 8.1      | 7.6  | <b>1.07</b><br>(1.01-1.12)  | 25%              | 23%  | 18.8    | 19.7 | <b>0.95</b><br>(0.92-0.98)  | 58%              | 60%  | 1.6     | 2.1  | <b>0.77</b><br>(0.69-0.86)  | 5%               | 6%   |
| 2010-14            | 4.9       | 2.7  | <b>1.82</b><br>(1.67-1.97)  | 17%              | 10%  | 6.6      | 5.7  | <b>1.15</b><br>(1.08-1.22)  | 23%              | 22%  | 16.6    | 16.1 | 1.03<br>(0.99-1.07)         | 59%              | 63%  | 1.0     | 1.3  | <b>0.79</b><br>(0.68-0.92)  | 4%               | 5%   |
| <b>50-54 years</b> |           |      |                             |                  |      |          |      |                             |                  |      |         |      |                             |                  |      |         |      |                             |                  |      |
| 2001-04            | 9.1       | 8.6  | <b>1.06</b><br>(1.00-1.12)  | 18%              | 12%  | 13.7     | 18.1 | <b>0.75</b><br>(0.72-0.79)  | 27%              | 25%  | 27.0    | 38.7 | <b>0.70</b><br>(0.68-0.71)  | 54%              | 54%  | 4.2     | 6.3  | <b>0.66</b><br>(0.62-0.72)  | 8%               | 9%   |
| 2005-09            | 10.2      | 8.0  | <b>1.27</b><br>(1.21-1.34)  | 19%              | 12%  | 13.9     | 15.9 | <b>0.88</b><br>(0.84-0.91)  | 25%              | 23%  | 30.7    | 39.9 | <b>0.77</b><br>(0.75-0.79)  | 56%              | 58%  | 2.7     | 4.6  | <b>0.59</b><br>(0.55-0.64)  | 5%               | 7%   |
| 2010-14            | 10.5      | 7.1  | <b>1.47</b><br>(1.40-1.55)  | 18%              | 11%  | 14.0     | 14.4 | 0.98<br>(0.94-1.02)         | 24%              | 23%  | 33.8    | 37.8 | <b>0.89</b><br>(0.87-0.92)  | 58%              | 60%  | 2.2     | 3.5  | <b>0.65</b><br>(0.59-0.71)  | 4%               | 6%   |

Data are based on all registries with available data in the NAACCR public use database<sup>2</sup> from 2001-2014. Reference group for IRRs is males. Persons of Hispanic ethnicity were excluded. IRRs were calculated using unrounded rates. Bold indicates the IRR is significantly different from 1.00 (p < 0.05). Rates are per 100,000 person-years. Staging definitions are per SEER Summary. Data years 1995-2000 were excluded because staging data were not available.

## SUPPLEMENTARY REFERENCES

1. SEER Program (<https://www.seer.cancer.gov>) SEER\*Stat Database: Mortality — All COD, Aggregated With State, Total U.S. (1990–2015) <Katrina/Rita Population Adjustment>, National Cancer Institute, DCCPS, Surveillance Research Program, released December 2017. Underlying mortality data provided by NCHS (<https://www.cdc.gov/nchs>).
2. SEER\*Stat database: NAACCR incidence data — CiNA Analytic File, Public Use (which includes data from CDC’s National Program of Cancer Registries (NPCR), CCCR’s Provincial and Territorial Registries, and the NCI’s Surveillance, Epidemiology and End Results (SEER) Registries), certified by the North American Association of Central Cancer Registries (NAACCR) as meeting high-quality incidence data standards for the specified time periods, submitted December 2016.
